# Supplementary material for: Fluid-mediated, brittle-ductile deformation at seismogenic depth: Part I – Fluid record and deformation history of fault-veins in a nuclear waste repository (Olkiluoto Island, Finland)
Source: Copernicus journal article supplement (doi:10.5194/se-2019-5), 2019-01-21
Supplement: Supplementary file [file se-2019-5-RC4-supplement.pdf]

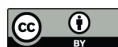

1 **Fluid-mediated, brittle-ductile deformation at seismogenic depth:**  
2 **Part I- Fluid record and deformation history of fault-veins in a**  
3 **nuclear waste repository (Olkiluoto Island, Finland)**

4  
5 Barbara Marchesini<sup>1§</sup>, Paolo Stefano Garofalo<sup>1</sup>, Luca Menegon<sup>2</sup>, Jussi Mattila<sup>3</sup> and Giulio Viola<sup>1</sup>

6  
7 <sup>1</sup>Dipartimento di Scienze Biologiche, Geologiche e Ambientali, Università di Bologna, Italy

8 <sup>2</sup>School of Geography, Earth and Environmental Sciences, University of Plymouth, PL48AA Plymouth, UK

9 <sup>3</sup>Geological Survey of Finland (GTK), Espoo, Finland

10 *Correspondence to:* [barbara.marchesini2@unibo.it](mailto:barbara.marchesini2@unibo.it)

11

12 **Abstract.** The dynamic evolution of fault zones at the seismogenic brittle-ductile transition zone (BDTZ) expresses the delicate  
13 interplay of numerous physical and chemical processes that occur at the time of strain localization. Deformation and flow of  
14 aqueous fluids in these zones, in particular, are closely related and mutually dependent during cycles of repeating, transient  
15 frictional and viscous deformation. Despite numerous studies documenting in detail seismogenic faults exhumed from the  
16 BDTZ, uncertainties remain as to the role of fluids in facilitating deformation in this zone, particularly with regard to the  
17 mechanics of broadly coeval brittle and ductile deformation. We combine here structural analysis, fluid inclusion data and  
18 mineral chemistry data from synkinematic and authigenic minerals to reconstruct the temporal variations in P, T and bulk  
19 composition of the fluids that mediated deformation and steered strain localization in a strike-slip fault from the BDTZ. This is  
20 a fault formed within the Paleoproterozoic migmatitic basement of southwestern Finland, hosting in its core two laterally  
21 continuous quartz veins formed by two texturally distinct quartz types – Qtz I and Qtz II, where Qtz I is demonstrably older  
22 than Qtz II. Veins within the diffuse damage zone of the fault are infilled by Qtz I. Multi-scalar structural analysis indicates  
23 recurrent cycles of mutually overprinting brittle and ductile deformation. Fluid inclusion microthermometry and mineral pair  
24 geothermometry indicate that both quartz types precipitated from a fluid that was in a homogeneous state during the recurrent  
25 cycles of faulting, and whose bulk salinity was in the 0-5 wt% NaCl<sub>eq</sub> range. The temperature of the fluid phase involved with  
26 the various episodes of initial strain localization and later reactivation changed with time, from c. 240 °C in the damage zone to  
27 c. 350 °C in the core during Qtz I precipitation to < 200°C at the time of Qtz II crystallization. Fluid pressure estimates show an  
28 oscillation in pore pressure comprised between 160 and 10 MPa during the fault activity stages. Our results suggest significant  
29 variability in the overall physical conditions during the fault deformation history, possibly reflecting the interaction of several  
30 batches of compositionally similar fluids ingressing the dilatant fault zone at different stages of its evolution, each with specific  
31 T and P conditions. Initial, fluid-mediated embrittlement of the faulted rock volume generated a diffuse network of joint and/or  
32 hybrid/shear fractures in the damage zone, whereas progressive strain localization led to more localized deformation within the

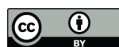

33 fault core. Localization was guided by cyclically increasing fluid pressure and transient embrittlement of a system that was  
34 otherwise at overall ductile conditions.

35 Our analysis implies that fluid overpressure at the brittle-ductile transition can play a key role in the initial embrittlement of the  
36 metamorphic basement and strain localization mechanisms.

37

## 38 **1 Introduction**

39 Physical and chemical properties of fault systems play a fundamental role in controlling the rheological behaviour of the Earth's  
40 crust and in steering channelled fluid flow (e.g. Caine et al., 1996). Deformation and fluid flow are closely related and mutually  
41 dependent via a number of feedbacks, such as the control that fluids exert upon the effectiveness of deformation processes and  
42 the development of fault systems at all scales, and the control by rock heterogeneities and/or fracture system topology on the  
43 net fault transmissivity (e.g. Crider and Peacock, 2004). The nucleation and development of permeable fault systems and the  
44 mechanisms whereby individual faults may weaken and eventually fail are, therefore, complex functions of a number of  
45 processes. In this perspective, the multiscale interaction between fluid and mineral phases within fault rocks needs to be  
46 studied with a system approach in order to single-out the roles and importance of all processes involved (Kaduri et al., 2017).

47 The most evident effect of fluid involvement, particularly in crustal volumes that have experienced large deformation-  
48 controlled fluid fluxes, is the precipitation of authigenic and hydrothermal minerals within faults (Oliver and Bons, 2001; Viola  
49 et al., 2016) and their immediately adjacent host rock (Mancktelow and Pennacchioni, 2005; Garofalo, 2004). In the  
50 seismogenic region of the crust, where fluids may even be the primary driver of the seismic cycle (e.g. Miller, 2013), faults have  
51 been shown to have the potential to function like a “fluid-activated valve”, whereby they experience transient and cyclic fluid  
52 pressure build-up before sudden fluid venting, pore pressure- and mechanical strength drop concomitant with seismic failure  
53 (e.g. Sibson, 1989, 1992b, 1993; Cox, 1995; Viola et al., 2006; De Paola et al., 2007; Wehrens et al., 2016). Hydrothermal ore  
54 deposits, where fault networks focus relatively large volumes of ore fluids and precipitate economic minerals (Cox et al., 2001),  
55 are also pertinent examples of significant deformation-controlled fluid ingress.

56 The seismogenic depth down to 10-15 km (e.g. Kohlstedt et al., 1995) is thus a key region of the crust where to study the whole  
57 range of fluid-rock interaction processes occurring within fault zones. Deformation at that depth might be accommodated under  
58 overall brittle-ductile conditions along fault systems crossing or rooting into the brittle ductile transition zone (BDTZ). In detail,  
59 the deformation style in the BDTZ is generally characterized by the cyclicity, also at the short time scale, between brittle and  
60 ductile behaviour. This is induced and regulated by the complex and transient interplay of numerous parameters, among which  
61 the lithological composition and transient variation of temperature, pore pressure and strain rate within the deforming system.  
62 Field studies have documented unequivocally that ductile and brittle deformation may even be simultaneously active during  
63 deformation as a function of the transient and spatially heterogeneous evolution of the chemical and physical parameters  
64 steering deformation, leading to the broad coexistence of geological features expressing frictional and viscous deformation  
65 mechanisms and to mutual crosscutting relationships thereof (e.g., Guermani and Pennacchioni, 1998; Kjøl et al., 2015;

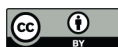

66 Pennacchioni et al., 2006 Wehrens et al., 2016).  
67 Veins are particularly important in this context because they attest to the relative abundance of aqueous fluids in the  
68 deformation history (e.g. Cox et al., 2001). Portions of the seismogenic crust that experience large fluid fluxes host large and  
69 vertically extensive vein networks (Sibson et al., 1988), within which up to several millions of m<sup>3</sup> of hydrothermal minerals  
70 may deposit from the flowing fluid (e.g. Heinrich et al., 2000; Cox, 2005; Bons, 2001; Garofalo et al., 2002). In contrast,  
71 portions of the crust deforming in the absence of significant fluid flow would show scarce evidence of- or no veining, with only  
72 synkinematic H<sub>2</sub>O-rich minerals within the fault rock attesting to hydrous conditions (cf. Mancktelow and Pennacchioni, 2004;  
73 Menegon et al., 2017).

74 The physical-chemical conditions of fluid-rock interaction in the BDTZ have been extensively studied within exhumed faults  
75 by applying a set of geochemical tools that include fluid inclusion data (Ault and Selverstone, 2008; Garofalo et al., 2014;  
76 Siebenaller et al., 2016; Compton et al., 2017), isotopic compositions of fault fluids and mass transfer calculations between host  
77 rock and fault rocks (Goddard and Evans, 1995; Garofalo, 2004; Mittempergher et al., 2014; Spruzeniece and Piazzolo, 2015).  
78 These data yield important constraints on the PT conditions of fluid-rock interaction within the studied faults, on the source  
79 region of the fluids reaching and flowing within the BDTZ and on element mobility during syn-tectonic fluid flow. These  
80 studies, however, provide only limited information on the role of fluids on the potentially complex mechanisms that trigger and  
81 permit the aforementioned cycles of brittle-ductile deformation. Open questions remain, such as, for example, which Pressure-  
82 Temperature-Composition (PTX) conditions are best for a fluid to trigger brittle-ductile deformation cycles in a fault system  
83 within the BDTZ, and which fluid property is specifically most effective in controlling the cycles.

84 In this work, we combine the meso- and microstructural observations with geochemical analysis of fluids, petrographic  
85 documentation, microthermometric properties of fluid inclusion assemblages, electron probe microanalyses (EPMA) of fault  
86 minerals, Raman spectrometry of fluid inclusions, and electron probe cathodoluminescence imaging to study the effects of  
87 numerous cycles of fluid-rock interaction that have occurred in a vein-rich deformation zone from within the BDTZ of the  
88 seismogenic region of the Paleoproterozoic continental crust of southwestern Finland. The studied deformation zone belongs to  
89 an exhumed conjugate fault system that experienced a complex history of structural reactivation and fluid flow. Deformation  
90 zone BFZ300, the target of our study, crops out at c. 426 m below sea level within the deep nuclear waste repository that is  
91 presently being built in the island of Olkiluoto (Fig. 1a).

92 We show that this dataset constrains the physical and chemical conditions that prevailed at the time of fault initiation and  
93 subsequent cyclic strain localization. The adopted integrated approach provides detailed and new insights into the mechanisms  
94 steering deformation within the BDTZ. We propose a mechanical conceptual model that accounts for the constraints derived  
95 from our multidisciplinary approach.

## 96 **2 Geological setting**

97 The study area is located in southwestern Finland, on the island of Olkiluoto (Fig.1a) within the Paleoproterozoic Svecofennian  
98 orogenic province, which is characterized by supracrustal high-grade metamorphic sequences and plutonic rocks. The most

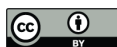

99 abundant lithologies in the study area are variably migmatitic metasedimentary rocks interleaved with metric levels of  
100 metavolcanic rocks, calc-alkaline synorogenic TTG-type granitoids, and late orogenic leucogranites (Fig. 1a). For a detailed  
101 lithological characterization of the area, we refer the reader to Hudson and Cosgrove (2005) and Aaltonen et al. (2016).

102 Numerous studies carried out on Olkiluoto have highlighted the long geological evolution of the region, which is commonly  
103 summarised by tectonic models for the Paleoproterozoic evolution of southern Finland proposing either an evolution during a  
104 single and semi-continuous Svecofennian orogenic event (Gorbatshev and Bogdanova, 1993) or, instead, a sequence of up to  
105 five distinct accretion events leading to the amalgamation of several microcontinents and island arcs at the margin of the  
106 Archean craton between 1.92 and 1.79 Ga (e.g. Lahtinen et al., 2005). In this scenario, several subduction systems developed,  
107 and the collision of the involved microcontinents and island arc complexes resulted in conspicuous continental growth, forming  
108 the major part of the Paleoproterozoic domain of the Fennoscandian Shield (1.89-1.87 Ga). According to Lahtinen et al. (2005),  
109 this “Fennian accretionary event” ended with a phase of orogenic collapse associated with regional extension and remarkable  
110 crustal thinning between c. 1.86 and 1.84 Ga. Renewed compression ensued during collision of the “Sarmatian Plate” with the  
111 previously consolidated Svecofennian Shield, causing major crustal shortening, high temperature regional metamorphism  
112 (Kukkonen and Lauri, 2009) and the emplacement of S-type granites (e.g. Ehlers et al., 1993). Tectonic activity ascribable to  
113 this orogenic phase ceased with a new orogenic collapse at 1.79-1.77 Ga (Lahtinen et al., 2005).

114 Pervasive reworking of the Svecofennian domain took place in the Mesoproterozoic when the crust underwent significant  
115 stretching and was intruded by voluminous Rapakivi granites and diabase dykes resulting from the widespread melting of the  
116 lower crust at c. 1.65-1.50 Ga. This tectonic phase was probably due to the development of a rift along the present Baltic Sea  
117 (Korja et al., 2001). Crustal thinning caused also the formation of the “Satakunta Graben”, a NW-SE trending graben located c.  
118 50 km to the north of Olkiluoto, which was later filled by Mesoproterozoic sandstone (Jotnian sandstones, Fig. 1a). The latest  
119 stage of crustal evolution in southern Finland is expressed by the intrusion of 1.27-1.25 Ga, N-S striking olivine diabase dikes  
120 (Fig. 1a; e.g., Suominen, 1991).

121 As to the structural evolution of the study area, the bedrock was affected by complex, polyphase ductile deformation between  
122 1.86 and 1.81 Ga. According to the evolutionary deformation scheme proposed by Aaltonen et al. (2010) the results of up to  
123 five different phases, referred to as D<sub>1</sub>-D<sub>5</sub>, are preserved in the local structural record, each characterised by structures with  
124 distinctive mineral composition, metamorphic grade, geometry and kinematics. The most relevant phases to our study are D<sub>2</sub> to  
125 D<sub>4</sub>. During these ductile episodes, a regional and pervasive NE-SW striking and moderately SE-dipping foliation developed,  
126 strain localized along mesoscopic shear zones parallel to subparallel to the foliation and extensive migmatization occurred  
127 under amphibolite-facies metamorphic conditions. NNE-SSW and N-S striking mylonitic shear zones also formed under those  
128 conditions, whereas later ductile events developed under progressively lower-grade metamorphism until c. 1.7 Ga ago, when  
129 brittle deformation became the dominant deformation style in response to progressive regional exhumation and cooling (Mattila  
130 and Viola, 2014; Aaltonen et al., 2016). The penetrative, inherited ductile grain that by then characterised the crystalline  
131 basement and that was suitably oriented with regard to the prevailing stress field was invariably reactivated. This is the case for



132 several NNE-SSW striking faults mapped underground in the Onkalo repository, which clearly overprint earlier D4 shear zones  
133 and fully exploit the pre-existing ductile precursors. Other faults, however, do not show any clear relation to the older ductile  
134 fabric and cut it discordantly. The subvertical, dextral deformation zone we discuss in this paper, BFZ300, is a good example of  
135 this.

136 In detail, BFZ300 belongs to a set of subvertical, conjugate brittle-ductile to fully brittle strike-slip faults characterized by N-S-  
137 trending sinistral and NW-SE dextral faults. Both sets show a complex history of reactivation and contain evidence for cyclic  
138 and transient switches between brittle and ductile deformation at all scales. Meso- and microstructural studies show that the  
139 sinistral faults overprint and probably reactivate a dextral viscous precursor related to earlier, localized ductile deformation.  
140 These faults locally contain pseudotachylyte injections, which attest to seismic behaviour during deformation (Menegon et al.,  
141 2018). In contrast, dextral faults cut across the foliation, do not exploit any ductile precursors and do not host pseudotachylytes.  
142 The fault zone studied here belongs to this second group of faults. In the following, we describe its architecture, reconstruct its  
143 deformation history and constrain the deformation mechanisms and faulting conditions that acted during its nucleation and  
144 subsequent development. The architecture and deformation history of the remarkably different conjugate structure of  
145 BFZ300, which is a sinistral brittle ductile deformation zone, whose seismic brittle failure was steered by the presence of  
146 a penetrative ductile precursor, will be described in a separate companion paper.

### 147 **3 Applied methods**

148 Field documentation and sampling were carried out at the underground BFZ300 exposures of Onkalo, which are necessarily  
149 limited in extent but that, together with the logged diamond drill holes from the underground exploration, allow a well-  
150 constrained 3D reconstruction of the local geology. The studied fault section is located at a depth of 426 m b.s.l. (Fig. 1b) and is  
151 about 8 m long. To characterize the fault architecture and constrain the spatial and temporal association of fault rocks and the  
152 type of fluid involved in the deformation, several outcrop samples, each representative of a distinct structural domain, were  
153 collected at the outcrop (TPH-2, TPH-3, TPH-4, TPH-5 and TPH-6), in addition to samples PH 21 and PH22 from a diamond  
154 drill core that intersects BFZ300 at the same depth in an area that is currently not excavated (Fig. 3). From these samples we  
155 prepared 10 petrographic thin sections (samples: TPH120-2, TPH 120-4, TPH 120-6, PH-21 and PH-22) and 9 doubly-polished  
156 sections for fluid inclusion analysis (thickness: ~150 µm, samples: TPH120-2, TPH 120-4, TPH 120-6, PH-21 and PH-22). Due  
157 to the extensive reactivation of the fault zone and the consequent obliteration of the FI record, FI study was carried out only in  
158 samples TPH 120-4, TPH 120-6, PH-21. Hand samples and drill cores localities are specified in Fig. 2.

159 Microstructural work was carried out on oriented petrographic thin sections cut orthogonally to the foliation and parallel to the  
160 striae that track the overall strike-slip kinematics of the deformation zone. Striae are defined by elongated trails of chlorite  
161 grains, at the vein-host rock boundary.



### 162 3.1 Fluid inclusions and mineral chemistry

163 Fluid inclusion measurements were conducted on “fluid inclusion assemblages” – FIAs, i.e. on petrographically discriminated,  
164 cogenetic groups of fluid inclusions located along trails or (less commonly) within clusters (Bodnar, 2003a; Goldstein, 2003).  
165 By definition, FIAs are groups of inclusions that have been trapped together at a specific stage of mineral formation, and, as  
166 such, give the highest level of confidence when characterizing the properties of trapped fluids and discriminating possible  
167 stages of post-entrapment re-equilibration (Bodnar, 2003b, and ref. therein). We identified appropriate FIAs that constrain the  
168 deformation history of BFZ300, but also applied the Roedder’s identification criteria of FIAs according to the timing of  
169 entrapment (i.e., primary, secondary, pseudosecondary) in order to link stages of fluid entrapment with stages of brittle and  
170 ductile deformation of quartz. In this regard, we can consider FI trails as synkinematic features, where FIAs are entrapped  
171 during stages of brittle deformation and fluid circulation, such that FIAs arranged along trails of the same orientation and with  
172 similar petrographic features might be representative of the same deformational event.

173 In the selected samples, we studied 12 FIAs entrapped within two distinct generations of quartz infilling two different  
174 generations of veins (named Qtz I and Qtz II, see description below) and exhibiting the least petrographic evidence of post-  
175 entrapment overprinting by later ductile and brittle deformation, which provided c. 400 microthermometric properties. Due to  
176 the well-documented tendency of fluid inclusions to modify their shape, volume, and composition after their initial entrapment  
177 even at low deviatoric stress conditions (e.g. Diamond et al., 2010; Kerrich, 1976; Tarantola et al., 2010; Wilkins and Barkas,  
178 1978), working on FIAs that are as similar as possible to those preserving the pristine fluid conditions is essential when aiming  
179 at the study of the original physical and chemical properties of the fluid involved in the fault activity.

180 Microthermometric properties of fluid inclusions were determined at the Department of Biological, Geological and  
181 Environmental Sciences of the University of Bologna using a Linkam THMSG 600 heating/freezing stage coupled with an  
182 Olympus BX51 polarizing microscope. The microthermometry stage was calibrated by using synthetic fluid inclusion samples  
183 at  $-56.6$ ,  $0.0$ , and  $374$  °C, which correspond to the melting of  $\text{CO}_2$ , ice melting, and final homogenization of  $\text{H}_2\text{O}$  inclusions,  
184 respectively. Obtained accuracies were  $\pm 0.3$  °C for final ice melting temperature ( $T_{\text{mice}}$ ) and  $\pm 3$  °C for final homogenization  
185 temperature ( $T_{\text{htot}}$ ). In order to produce an internally consistent dataset, all phase transitions were exclusively collected for  
186 individual FIAs and measured by the same standard procedure. Samples were first rapidly cooled to c.  $-180$  °C and then slowly  
187 heated to detect the potential formation of a solid carbonic phase, eutectic phases, salt hydrates, ice, and clathrates. The  $T_{\text{htot}}$   
188 were later determined in the FIAs by heating the samples from room temperature and recording the mode of homogenization  
189 (i.e., by bubble or liquid disappearance). All phase transitions were measured by using the cycling method described by  
190 Goldstein and Reynolds, 1994, and care was taken in recording the minimum and maximum values for each assemblage.

191 Volume fractions of individual fluid inclusions determined as % of the ratio  $\phi = V_v/V_{\text{tot}}$  (cf. Diamond, 2003), were estimated  
192 optically at room temperature using calibrated charts. Salinity, bulk densities and isochores were computed from the measured  
193  $T_{\text{mice}}$  values using the HokieFlincs Excel spreadsheet (Steele-MacInnis et al., 2012 and reference therein).





194 Micro-Raman spectrometric analysis of fluid inclusions was carried out at the Department of Mathematical, Physical and  
195 Computer Sciences of the University of Parma (Italy) using a Jobin-Yvon Horiba LabRam spectrometer equipped with He-Ne  
196 laser (emission line 632.8 nm) and motorized XY stage. The spectral resolution of the measurements was determined as nearly  
197  $2\text{ cm}^{-1}$ . The confocal hole was adjusted to obtain a spatial (lateral and depth) resolution of  $1\text{--}2\text{ }\mu\text{m}$ . Most spectra were obtained  
198 with a  $50\times$  objective (N.A. 0.75), although for shallow inclusions also a  $100\times$  objective (N.A. 0.90) was used. The calibration  
199 was made using the  $520.7\text{ cm}^{-1}$  Raman line of silicon. A wide spectral range ( $100\text{--}3600\text{ cm}^{-1}$ ) was scanned for each inclusion  
200 for the presence of  $\text{CO}_2$ ,  $\text{N}_2$ ,  $\text{CH}_4$ , and  $\text{H}_2\text{S}$ , but the final acquisitions were made mainly between  $1100$  and  $1800\text{ cm}^{-1}$  for the  
201 study of  $\text{CO}_2$  spectra, and between  $2500$  and  $3300\text{ cm}^{-1}$  for  $\text{CH}_4$  and  $\text{H}_2\text{S}$ . The acquisition time for each spectral window was  
202  $120\text{--}240\text{ s}$ , with two accumulations. The power on the sample surface is nearly  $1\text{ mW}$  but the power on the analysed inclusions  
203 has to be considered lower due to reflections and scattering. Analyses were carried out on the vapour bubbles of the fluid  
204 inclusions.

205 After the calculation of representative fluid inclusion isochores for each FIA, the pressure corrections were assessed by using  
206 the crystallization temperatures of two mineral pairs – namely chlorite-quartz and stannite-sphalerite – as independent input  
207 parameters for Qtz I and Qtz II veins, respectively. Chlorite-quartz temperatures were calculated by using the method of  
208 Bourdelle and Cathelineau (2015), which assumes quartz-chlorite equilibrium and uses ratios of chlorite end-member activities  
209 to link the chlorite compositions with the corresponding formation temperatures through the quartz-chlorite equilibrium  
210 constants. This method is based on the measurements of the concentrations of the major chlorite components (Si, Fe, Mg) and  
211 can only be applied to chlorites with  $(\text{K}_2\text{O} + \text{Na}_2\text{O} + \text{CaO}) < 1\text{wt}\%$ , indeed the case of our chlorites. To estimate the formation  
212 temperature of cogenetic sulphides associated with Qtz II we used the stannite-sphalerite formation temperature following the  
213 method proposed by Shimizu and Shikazono (1985). This geothermometer uses the temperature dependency of iron and zinc  
214 partitioning between stannite and sphalerite (Nekrasov et al., 1979) as a useful temperature indicator of the association Qtz II-  
215 stannite and sphalerite.

### 216 3.2 Electron Probe Microanalysis (EPMA)

217 EPMA of fault minerals were carried out by using a JEOL-8200 wavelength-dispersive electron microprobe housed at the  
218 Department of Earth Sciences of the University of Milan, Italy. The instrument fits 5 WDS spectrometers utilizing lithium  
219 fluoride (LiFH), pentaerythritol (PETJ and PETH), and thallium acid phthalate (TAP) analysing crystals and an optical  
220 microscope. Samples were probed with a beam size of  $\sim 1\text{ }\mu\text{m}$  at  $15\text{ keV}$  and  $5\text{ nA}$  beam current. Synthetic and natural materials  
221 were used as calibration standards at the beginning of each session. Analytical  $1\text{-}\sigma$  errors are typically  $< 4\%$  for major elements  
222 and for the minor elements.

223 Panchromatic cathodoluminescence (CL) imaging was performed by using the CL CCD detector adjacent to the optical  
224 microscope of the JEOL-8200 on the sections used for microstructural work. The electron beam was focused on the sections  
225 with an accelerating voltage of  $15\text{ kV}$  and  $30\text{ nA}$  beam current. Black/white digital images were collected with a  $40\times$



226 magnification by beam mapping with the CCD detector at a spatial resolution of 1  $\mu\text{m}$  (beam resolution), which resulted in  
227 imaged areas of 27.8 x 22.2 mm. The exposure time for image acquisition was 120 s.

## 228 4 Results

### 229 4.1 BFZ300 fault architecture

230 BFZ300 strikes NNW-SSE and dips very steeply to subvertically to the southwest (Fig. 2a). It cuts through high-grade veined  
231 migmatite, interlayered with gneiss and pegmatitic granite. At the studied underground outcrop with a length of 8 m, the fault is  
232 a strike-slip fault system formed by two main subparallel fault segments connected by a mesoscopic step-over zone.  
233 Subhorizontal striae and kinematic indicators such as chlorite slickensides and R and R' planes indicate invariably dextral  
234 kinematics. The most striking mesoscopic characteristic of BFZ300 is the presence in the fault core of a composite set of almost  
235 continuous quartz veins (between 1 and 20 cm in thickness) along the entire exposed strike length. A schematic representation  
236 of the fault zone is shown in Figure 2.

237 The fault contains a 0.5-2 m thick damage zone separated by the host rock by two discrete bounding surfaces (Y planes  
238 according to Tchalenko, 1970 Fig. 2a). The damage zone can be defined in the field on the basis of the presence of a fractured  
239 volume containing sets of conjugate dextral and sinistral hybrid fractures (Fig. 2b) intersecting to form a tight acute angle of c.  
240 38° (Fig.2a). Laterally continuous, NNW-SSE striking quartz-filled Mode I fractures (joints) invariably bisect this angle  
241 (Fig.2ab), helping to constrain the stress field orientation at the time of fracture formation, with the greatest compressive stress  
242 axis  $\sigma_1$  parallel to the Mode I fracture strike and oriented c. NNW-SSE. Joints are sharp and have a regular spacing of c. 10 cm.  
243 Quartz infilling the joints and the hybrid fractures of the damage zone forms veins up to 1-1.5 cm in thickness and is referred to  
244 as Qtz I hereinafter. Its microstructural characteristics are described in detail below (Fig. 2b). Fractures and faults decorated by  
245 Qtz I have a translucent look that reflect the generally fine grain size of Qtz I (< 1 cm, Fig. 3b.). Locally they are formed by en-  
246 echelon tensional segments connected by shear planes not decorated by any quartz infill (Fig. 2c). Joints occur also as barren  
247 fractures defining a penetrative sympathetic fracture cleavage (sensu Basson and Viola, 2004; stereonet of Fig. 2a). In general,  
248 fracture density within the damage zone tends to increase towards the fault core.

249 The fault core is bounded by two main discrete slip surfaces (Y, Figs.2ae and 3a). It contains, and is defined by, two distinct  
250 generations of quartz veins (Fig. 2d) that are interrupted and offset laterally by a metric step-over zone (Fig. 2e-g). The main  
251 quartz vein of the core is infilled by quartz exhibiting the same microstructural characteristics of Qtz I in the damage zone; we  
252 therefore refer to it as a Qtz I vein. It is accompanied by a younger, subparallel vein formed by a milky-white type of quartz  
253 with a significantly larger quartz grain size than Qtz I (>1 cm) that we refer to as Qtz II (Figs. 2deg and 3). Locally, pockets of  
254 cataclasite and breccia are also observed along and inbetween the two veins. Microstructural analysis reveals that they formed  
255 at the expense of the host gneiss (Fig. 3bd). The Qtz II vein shows a quite irregular, curved geometry (Figs. 2d and 3c) and a  
256 variable thickness up to a maximum of c. 20 cm. The minimum Qtz II vein thickness coincides spatially with a lateral apparent  
257 displacement of the vein. The BFZ300 core varies in thickness between 20 and 30 cm along most of the exposed fault length,





258 but becomes thicker (up to 50 cm) in the compressional step-over zone that connects the two fault segments that are offset  
259 laterally by c. 1 m. The step-over zone is defined by synthetic T fractures (Figs. 2eg) and contains a decimetric brecciated lens  
260 (Fig. 2e). T fractures are generally filled by Qtz I veins (Fig. 2f).

261 Chlorite is present as a secondary phase, with a modal abundance between 5 and 10 vol% in both Qtz I and Qtz II veins. In Qtz  
262 I veins it occurs as euhedral/subhedral crystals that are up to 1-2 mm in size. Chlorite is present mostly as a disseminated,  
263 interstitial phase, concentrated mainly in the internal part of the vein. In the Qtz II vein, however, it occurs as elongated crystals  
264 (5-8 mm in length) arranged perpendicularly to the walls of the vein, which suggests orthogonal dilation at the time of opening  
265 (Fig. 3b). The Qtz II vein contains also small (1-2 cm) aggregates of sulphides (sphalerite, pyrite, galena, and chalcopyrite)  
266 mainly concentrated in the central part of the vein (Fig. 3b). Qtz II-sulphide mineral associations and their textures are  
267 described in detail below.

268 As observed in the field, the presence of Qtz I veins along the joints in the damage zone and the continuity of the fault core Qtz  
269 I vein suggest Mode I fracturing during Qtz I emplacement (Fig.3ac). The semi-continuous **parallelism** Qtz I and Qtz II veins in  
270 the fault core, combined with the location of the Qtz II vein along the walls of the Qtz I vein, suggest the partial reactivation of  
271 the Qtz I vein during Qtz II emplacement. Dilation leading to Qtz II emplacement exploited and further reworked the Qtz I-host  
272 rock contact, that seemingly had lower tensile strength than the pristine migmatite. The reconstructed time relationship between  
273 the two vein generations is also consistent with local evidence of the Qtz II vein partially crosscutting parts of the Qtz I vein  
274 (Fig. 3a).

## 275 4.2 BFZ300 microstructural analysis

276 In the following we provide a description of the microstructural characteristics of BFZ300 by detailing our findings and  
277 observations separately for the main structural domains of the fault zone.

278

### 279 4.2.1 Damage zone

280 Qtz I veins within the damage zone cut across the migmatitic host rock and form the infill of conjugate sets of hybrid fractures,  
281 which, when studied at the microscale, appear as formed by dilatant segments joined by cataclastic shear fractures (Fig. 4a).  
282 Shearing is well documented by the asymptotic bending into the shear surfaces of foliation planes formed by the alignment of  
283 chlorite and muscovite, both partly altered to sericite and chlorite, respectively (Fig.4a). Qtz I infilling the tensional segments  
284 has an average grain size between 200  $\mu\text{m}$  and 3 mm and exhibits a rather heterogeneous texture, from purely blocky to mixed  
285 elongated-blocky (Figs. 4bc). The largest crystals (800  $\mu\text{m}$  to 1 mm) are elongated and stretch from the vein walls towards the  
286 inner part of the vein (Figs. 4c and 5a), which is consistent with a syntaxial growth mechanism (Bons et al., 2012). At least two  
287 episodes of vein growth/renewed dilation, as indicated by the presence of median lines (ML), are clearly visible within one of  
288 the studied veins and confirm a syntaxial growth mechanism for the vein (Fig. 5). Medial lines are defined by the alignment of  
289 chlorite, sericite, and carbonate aggregates (Fig. 5bc). Blocky euhedral quartz crystals are also found, with a grain size between



300 to 600  $\mu\text{m}$ . These crystals are juxtaposed to very fine grained quartz ( $<200 \mu\text{m}$ ) within sericite-rich cataclastic bands (Fig.4b). These cataclasites contain also hydrothermally altered host-rock fragments including pervasively altered K-feldspar bearing lithic fragments and phyllosilicates.

With the exception of the blocky variety, Qtz I crystals exhibit various degrees of viscous deformation and recovery. They contain widespread evidence of undulose extinction and extinction bands, indicating distributed internal plastic deformation. Cathodoluminescence imaging of Qtz I shows the presence of a diffuse network of healed quartz microfractures (Fig. 4d), which demonstrates healing subsequent to brittle deformation and fracturing.

Chlorite occurs as a disseminated phase within the Qtz I veins of the damage zone and in textural equilibrium with quartz. It has a peculiar vermicular texture (Fig. 5b), crystal dimensions of about 100  $\mu\text{m}$ , and displays interference colours ranging from violet to Berlin blue. Vermicular chlorite forms small pockets mainly located in the central part of the veins and at the triple junctions of blocky quartz crystals.

#### 4.2.2 Fault core

In the BFZ300 fault core, the grain size of Qtz I is strongly variable within the vein, suggesting the presence of heterogeneous and complex structural sub-domains of deformation. Qtz I has the smallest observed grain size (range: 30-800  $\mu\text{m}$ , Fig. 6a) and documents multiple and cyclic episodes of mutually overprinting brittle and ductile deformation leading to a complex microstructural record. The earliest post-vein emplacement recognised deformation stage is reflected by the low-temperature, intracrystalline deformation of the largest crystals (400-800  $\mu\text{m}$  in size). Typical microstructures, such as undulose extinction, wide extinction bands (WEBs, Derez et al., 2015), and bulging along grain boundaries are the most common microstructures ascribable to this deformation stage (Fig. 6ab). A distinct, brittle deformation event is documented by narrow intracrystalline fractures that crosscut the largest quartz crystals (Fig. 6bc), and which locally contain new grains of quartz ranging in size between 20-100  $\mu\text{m}$  (Fig. 6d). More in detail, these new grains form parallel bands that are oriented at low angle ( $<30^\circ$ ) to the vein walls and that can be up to 2 mm in length and 200  $\mu\text{m}$  in thickness. Plastically deformed Qtz I crystals hosting these intracrystalline bands of new grains are cut across by a distinct set of subparallel intercrystalline fractures, which are interpreted as the expression of yet another deformation event that occurred under overall brittle conditions. These fractures are parallel to the strike of BFZ300 and are in turn healed by new quartz grains (grain size: 50-150  $\mu\text{m}$ ), and can be up to 2.5 cm in length and up to 500  $\mu\text{m}$  in width (Fig.6a). Their cathodoluminescence imaging shows that they are sealed and healed, yielding an homogeneous dark cathodoluminescence signal.

Qtz II within the fault core is typically coarse grained (individual crystals: 300  $\mu\text{m}$ -1 cm in size) and exhibits a regular blocky texture devoid of any shape or crystal preferred orientation (Fig. 7a). Locally, these large crystals display primary growth textures, such as primary FIAs oriented parallel to specific crystallographic planes. With the exception of undulose extinction, Qtz II does not show clear evidence of plastic deformation, although cathodoluminescence imaging of optically continuous Qtz II has also shown that a dense network of healed quartz microfractures locally crosscuts Qtz II crystals (Fig. 7c). These are



322 relatively thin (hundreds of  $\mu\text{m}$  thick) networks that are poorly visible to invisible by standard petrographic analysis. The only  
323 petrographic evidence for these healed microfractures within quartz are well defined trails of fluid inclusions crosscutting  
324 primary growth bands (Fig. 7d).

325 Chlorite is the second most abundant phase within the fault core Qtz I and Qtz II veins and occurs with a variety of textures.  
326 Aggregates of vermicular chlorite similar to that occurring in the damage zone are also present in the Qtz I from the core (Fig.  
327 8e), although chlorite with flaky and radiate textures (Fig. 8f) is also present. The latter type is generally 100-300  $\mu\text{m}$  in size  
328 and is in textural equilibrium with quartz and rare calcite. Radiate chlorite overgrowing fractured Qtz II (Fig. 7bc) suggests late  
329 Qtz II precipitation. Associated with Qtz II, a sulphide assemblage made of pyrite, sphalerite, galena, and chalcopyrite (Fig.  
330 7de, see also Fig. 3b) forms aggregates commonly located along quartz grain boundaries. In the studied sections, these  
331 aggregates have dimensions between 10 and 600  $\mu\text{m}$ . Chalcopyrite occurs as  $\mu\text{m}$  sized irregular inclusions within sphalerite  
332 forming the typical “chalcopyrite disease” texture (e.g., Barton and Bethke, 1987; Fig. 7e).

333 Multiply reworked breccias and cataclasites crosscut BFZ300. In the studied sections, a cataclastic band between 5 and 8 mm  
334 thick crosscuts both Qtz I and Qtz II veins (Fig. 8a), but is in turn crosscut by a different quartz-radiate chlorite vein displaying  
335 evidence of syntaxial growth. This cataclasite contains poorly sorted and angular quartz clasts varying in size between 8 and 12  
336 mm set in a finer (20-200  $\mu\text{m}$  in size) white mica-quartz matrix. The largest quartz fragments show irregular, lobate grain  
337 boundaries and are affected by undulose extinction. We interpret these textures as the product of dissolution and cataclastic  
338 reworking of a previous generation, plastically deformed quartz.

339 Parallel sets of stylolitic seams strike N-S parallel to the strike of BFZ300 and mark the two sides of the cataclastic band (Fig.  
340 9ac). They host anhedral sphalerite, stannite, galena, pyrite, and chalcopyrite (Fig. 9d), which are coeval with the formation of  
341 Qtz II vein. We interpret the presence of these anhedral sulphide minerals along the stylolite as the product of passive  
342 concentration by pressure-solution processes. We use the stannite-sphalerite mineral pair as a geothermometer for Qtz II  
343 emplacement.

#### 344 4.3. Fluid inclusion data

345 The studied FIAs contain invariably a two-phase fluid (liquid-vapour) and are mainly arranged in secondary trails within Qtz I  
346 crystals in the damage zone (Type S1) and also within Qtz I fault core, where they form dismembered (Type S2) trails and also  
347 appear as individual clusters inside the crystals affected by viscous deformation (Type-S3). Within the Qtz II fault core, FIAs  
348 are arranged as pseudosecondary (Type PS) and secondary (Type S4) trails. Representative examples of FI petrographic  
349 features are shown for each BFZ300 structural domain in Fig. 9. Table 1 gives a schematic representation of the location of the  
350 FI types presented above, in addition to their location in the fault architecture and their fluid properties.

351 *Damage Zone:* Within Qtz I grains (Fig. 9ab), secondary FIAs are found as trails (Fig. 9a) that parallel what we interpret as  
352 healed, old intracrystalline microfractures. These microfractures are likely to be old joints and hybrid fractures whose  
353 orientation mimics that of the mesoscopic BFZ300 structural features. In these assemblages, FIAs have a maximum size ranging



354 between 2 and 20  $\mu\text{m}$ , a regular equidimensional shape (i.e. negative crystal morphology), and relatively uniform  $\phi$  of 5-15%  
355 (Fig. 9b).

356 *Fault Core:* Qtz I grains host secondary FIAs, which are transgranular trails (Fig. 9c) representing healed joints and hybrid  
357 fractures. These trails are locally interrupted and dismembered by aggregates of new, fine-grained quartz grains (Fig. 9c), and  
358 generate a texture that is indeed typical of Qtz I from the fault core (cf. Fig. 6a). Fluid inclusions entrapped along these trails  
359 (Type S2) vary in size between 1 and 10  $\mu\text{m}$ , have a  $\phi$  of 10-20%, and show a negative crystal morphology (Fig. 9d). Fluid  
360 inclusions are also found as isolated clusters inside intensely recrystallised quartz domains (Fig. 9c). FIAs inside these  
361 recrystallized quartz domains were pervasively obliterated during later episodes of ductile deformation. The development of  
362 WEBS, intercrystalline bands and bulging (cf. Fig. 6) resulted in the transposition of these assemblages is invariably observed  
363 and is documented, for instance, by the presence of short, secondary trails of regularly shaped inclusion oriented at a high angle  
364 with respect to a longer, parent trail (Fig. 9c). Morphologically, these trails resemble the transposed trails documented in high-  
365 grade metamorphic rocks (Andersen et al., 1990; van den Kerkhof et al., 2014). Different types of fluid inclusion morphologies  
366 are found within the intensely recrystallized quartz domains (Fig. 9f). Negative crystal morphology is observed in some areas of  
367 the selected samples, but it is uncommon. More typical is instead the "dismembered" morphology (cf: Vityk and Bodnar, 1995;  
368 Tarantola et al., 2010), which is observed in the relatively large inclusions ( $> 20 \mu\text{m}$ ). This morphology is made of a central  
369 (often empty) inclusion, showing several tails and re-entrants, surrounded by a three-dimensional clusters of small "satellite"  
370 inclusions. These clusters might be arranged with a quasi-planar geometry inside the host (i.e. in a trail-like fashion). Another  
371 typical texture found in most assemblages is the "scalloped" morphology of small- to medium-sized inclusions ( $<10\text{-}15 \mu\text{m}$ ),  
372 which is defined by the presence of indentations, embayments, irregularities, and sharp tips of the inclusion walls (Fig. 9f).  
373 Small inclusions ( $<1 \mu\text{m}$ ) are also found at the edge of the straight, regular boundaries of new quartz grains; they are mostly  
374 dark, i.e. they are vapour-rich or empty, and are equant in shape (Fig. 9e). Although small inclusions do not allow a  
375 microtermometric study of the fluid-phase behaviour in this structural domain, they confirm the complex reactivation history of  
376 BFZ300.

377 Qtz II contains both pseudosecondary (Type-PS) and secondary (Type-S4) assemblages (Fig. 9g-j). The first type is arranged in  
378 trails, that cut at low angle the hosting quartz but not the neighbouring phases (e.g., chlorite, Fig. 9g). In these assemblages, FIAs  
379 are relatively large (2-45  $\mu\text{m}$ ). They show elongated shape and their  $\phi$  varies between 15 and 30 % (Fig. 9h). Type-S4 FIAs  
380 (Fig. 9i) have two-phase inclusions whose size (5-35  $\mu\text{m}$ ) is similar to that of PS trails, but show a  $\phi$  between 30 and 40 %  
381 (Fig. 9j).

382 Rare primary FIAs are also present along growth planes of Qtz II and are best observed predominantly in the least deformed  
383 Qtz II crystals, where they have a relatively large size (20-50  $\mu\text{m}$ ). Elsewhere they present irregular and "dismembered"  
384 textures, which suggest intense post-entrapment re-equilibration.



385 In summary, our microtextural study shows that the FIAs to be selected for the microthermometric study are only those hosted  
386 within Qtz I and Qtz II crystals with the minimum degree of recrystallization and whose inclusions have textures corresponding  
387 to the least intense post-entrapment re-equilibration (Bodnar, 2003b, and ref. therein; Tarantola et al., 2010). These are the  
388 pseudosecondary and secondary FIAs in which dendritic or transposed inclusions are absent, and in which the host quartz  
389 exhibits only undulose extinction (S1, S2, S4 and PS).

390 The majority of the secondary FIAs hosted within Qtz I from the damage zone show a range of  $T_{mice}$  between  $-5.9$  and  $0$  °C,  
391 which corresponds to a salinity of 0-9 wt% NaCleq (Fig. 10a). In these FIAs, final homogenization occurs by disappearance of  
392 the vapour bubble and mainly between  $150$ - $330$ °C (Fig.10e). The secondary FIAs hosted within Qtz I of the fault core (Type-  
393 S2) show a range of  $T_{mice}$  between  $-3.9$  and  $0$  °C, which corresponds to salinities between 0 and 6 wt% NaCleq (Fig.10b), and  
394 final homogenization by bubble disappearance is between  $150$  and  $420$ °C (Fig.10f).

395 The Type PS FIAs show a range of  $T_{mice}$  between  $-11$  and  $0$  °C, which corresponds to a salinity range of 0-15.2 wt% NaCleq  
396 (Fig.10c), and  $T_{htot}$  by bubble disappearance is comprised between  $150$  and  $440$ °C (Fig.10g). The Type S4 FIAs have a range  
397 of  $T_{mice}$  between  $-7.3$  and  $0$  °C, which corresponds to a 0-10.9 wt% NaCleq range of salinity (Fig.10d), while final  
398 homogenization by bubble disappearance is comprised between  $150$  and  $430$ °C (Fig.10h). Final homogenization occurs always  
399 by bubble disappearance.

400 Raman spectra from the vapour phase of fluid inclusions hosted by the Qtz I and II show peaks at the characteristic  
401 wavenumbers of  $CH_4$  ( $2917$   $cm^{-1}$ ) and  $CO_2$  ( $1388$   $cm^{-1}$ ). These peaks were determined as weak in all spectra, and  $CO_2$  detection  
402 was only sporadic in one of the sample of the fault core (TPH-120 4A). Such spectroscopic determinations are consistent with  
403 the lack of microthermometric evidence for  $CO_2$  or  $CH_4$  occurrence in the FIAs, i.e., with the failure to detect melting of a  
404 carbonic phase or clathrate hydrates during the freezing experiments (cf. Rosso and Bodnar, 1995; Dubessy et al., 2001). The  
405 impossibility to detect  $CO_2$ - and  $CH_4$ -bearing fluids via microthermometric determinations indicates a gas pressure in the  
406 analysed inclusions that is systematically lower than that required to observe clathrate dissociation (e.g., 1.4 MPa in  $CO_2$ - $H_2O$   
407 fluids, Rosso and Bodnar, 1995), i.e. it shows low gas concentrations. Considering the broad salinity range of 0.1-14 wt%  
408 NaCleq for the BFZ300 fluids (which corresponds to NaCl concentrations of  $1.7 \cdot 10^{-3}$  – 2.4 M), we cannot estimate a maximum  
409  $CH_4$  concentration.

#### 410 4.4 Chlorite and sulphide geothermometry

411 Chlorite composition has been determined for several generations of chlorites in association with Qtz I and II, namely  
412 vermicular chlorite associated with Qtz I from the damage zone, vermicular and radiate chlorite associated with Qtz I from the  
413 fault core, and radiate chlorite associated with Qtz II from the fault core (Table 2). The EPMA data show that, in general, the  
414 BFZ300 chlorites are Fe-rich ( $X_{Fe} = Fe/(Fe+Mg)$  between c. 0.65 and 0.90), have concentrations of  $(Na_2O+K_2O+CaO) < 1$   
415 wt%, and result mainly from a solid solution of the sudoite and daphnite end-members, i.e., of  $Mg_2Al_3(Si_3Al)O_{10}(OH)_8$  -  
416  $(Fe,Mg)_5Al(Si,Al)_4O_{10}(OH)_8$ . The dataset shows in particular that the compositions of the distinct chlorite generations vary



417 systematically with vein generation, as shown by the vermicular chlorite associated with Qtz I veins (Fig. 8e) with a XFe  
418 between 0.65 and 0.67 and the radiate chlorite associated with Qtz I from the fault core and Qtz II (Figs. 8f and 7b) with a XFe  
419 between 0.76 and 0.86.

420 Temperature-composition relationships for the quartz-chlorite pair portrayed in the  $T-R^{2+}$ -Si diagram of Bourdelle and  
421 Cathelineau (2015) show that, in the hypothesis of quartz-chlorite equilibrium, the precipitation of vermicular chlorite within  
422 the Qtz I of the damage zone took place in the 175-250 °C range (green diamonds of Fig. 11a). This range is distinct from that  
423 of the vermicular and radiate chlorite from Qtz I of the fault core, which is probably >350 °C because the measured  $R^{2+}$ -Si  
424 compositional parameters ( $R^{2+} = \text{Mg}+\text{Fe}$ ) plot at the edge of, or slightly outside, the calibrated region of the Bourdelle and  
425 Cathelineau plot (red diamonds of Fig. 11a). We stress that the high-T chlorite plots parallel to the 350 °C isotherm, suggesting  
426 that it precipitated most probably at the same, or at a similar, temperature. Radiate chlorite associated with Qtz II from the fault  
427 core is instead compatible with an equilibrium precipitation at 160-200 °C (light-blue diamonds in Fig. 11a).

428 The collected EPMA data show that the sulphides associated with Qtz II have compositions that approach those of pure phases  
429 (Table 3). Pyrite has trace element concentrations (Cu, As, Pb, Ni, Zn) that are in general below the EPMA detection limit,  
430 while galena, sphalerite, and chalcocopyrite show only some significant trace contents of Fe and Zn (e.g., Fe: 0.22-1.00 wt% in  
431 galena; Zn: 0.11-3.95 wt% in chalcocopyrite). Pyrite and sphalerite from the Qtz II veins (Fig. 7e) have trace element  
432 concentrations that are, again, mostly below detection limits.

433 The stylolites bordering the cataclasite bands described above and formed at the contact between the Qtz I and Qtz II vein  
434 contain pyrite, galena, and the sphalerite-stannite pair (Fig. 8acd), with the latter showing the largest compositional variation.  
435 This pair represents a mineral geothermometer because the partitioning of Zn and Fe between sphalerite and stannite was  
436 demonstrated to be temperature dependent but pressure independent (Nekrasov et al., 1979; Shimizu, M. and Shikazono, 1985).  
437 In the fourteen analysed pairs, stannite shows a range of Zn concentrations varying between 0.48 wt% and 3.25 wt%, while  
438 those of Fe, Cu and Sn vary within narrow ranges (Fe:  $12.74 \pm 0.56$  wt%; Cu:  $28.30 \pm 0.33$  wt%; Sn:  $27.65 \pm 0.71$  wt%).  
439 Sphalerite in the pair has concentrations of Fe and Zn of  $7.63 \pm 0.87$  wt% and  $56.68 \pm 1.17$  wt%, respectively. These ranges allow  
440 the calculation of the partition coefficient ( $K_D$ ) of the reaction:  $\text{Cu}_2\text{FeSnS}_4$  (in stannite) + ZnS (in sphalerite) =  $\text{Cu}_2\text{ZnSnS}_4$  (in  
441 stannite) + FeS (in sphalerite). We have used the  $\log K_D$ -T relationship of Shimizu and Shikazono (1985) to calculate the  
442 formation temperature of the pair, which is portrayed in the  $(X_{\text{Cu}_2\text{FeSnS}_4}/X_{\text{Cu}_2\text{ZnSnS}_4})-(X_{\text{FeS}}/X_{\text{ZnS}})$  plot of Shimizu and Shikazono  
443 (Fig. 11b). The resulting 220-305 °C interval lies at the low end of, or slightly outside, the 250-350 °C interval of the  
444 geothermometer. Therefore, while the 250-305 °C interval can be taken as an estimation of the formation T of sphalerite-  
445 stannite in the stylolite, the 220-250 °C interval should be taken with caution.

## 446 5 Discussion

447 Our work constrains the structural architecture and the environmental conditions at which BFZ300 deformation took place.  
448 Field and petrographic observations support the idea of transiently elevated fluid pressures, cyclic frictional-viscous





449 deformation and progressive, yet discrete strain localization (Figs. 2 and 3). Analytical data suggest that these deformation  
450 cycles took place at the BDTZ. In the following, we discuss these constraints by systematically considering our different  
451 analytical results.

### 452 **5.1. Fluid inclusion data and mineral-pair geothermometry**

453 Microthermometric and Raman spectrometry data show that the fluid entrapped within the studied FIAs at the time of formation  
454 of the damage zone and fault core during precipitation of Qtz I and Qtz II veins can be represented by a H<sub>2</sub>O-NaCl model fluid.  
455 The fluid was in a homogeneous state at the time of entrapment, as testified by the consistent final homogenization by bubble  
456 disappearance. It also had a low bulk salinity, as shown by the distribution of >80% of the ice melting (T<sub>ice</sub>) measurements  
457 skewed towards values of -3 °C or higher, which corresponds to bulk salinities of 5 wt% NaCl<sub>eq</sub> or less (Fig. 10a-d).

458 The documented T<sub>htot</sub> varies between c. 150 and 430 °C without a single mode or a skew (Fig. 11e-h). Such distribution shows  
459 that no common range of entrapment temperatures can be identified in the entire dataset, and that the properties of individual,  
460 well-identified FIAs do not correspond to those of well-preserved assemblages. Indeed, the ranges of T<sub>htot</sub> in individual FIAs  
461 are typically of the order of 150-200 °C (Fig. 10e-h), i.e. a value that is much higher than the ~10 °C range expected for  
462 homogeneous FIAs entrapped isochorically and isoplethically (Fall et al., 2009; Vityk and Bodnar, 1998) and that demonstrates  
463 post-entrapment re-equilibration (cf. Bodnar, 2003b; Sterner and Bodnar, 1989).

464 A major implication of fluid inclusion re-equilibration in our study is that the calculated fluid properties do not rigorously  
465 reflect those of the pristine fluid originally entrapped within BFZ300, but rather that of a fluid that modified its properties  
466 during the fault activity. This is comparable to the results of other fluid inclusions studies from faults (Boullier, 1999; Garofalo  
467 et al., 2014; Roedder, 1984).

468 In spite of these difficulties, a possible approach to interpret our FI dataset is the comparison with the experimental work on  
469 synthetic fluid inclusions subjected to a range of post-entrapment re-equilibration conditions (Bakker, 2017; Bakker and Jansen,  
470 1990, 1991, 1994; Vityk and Bodnar, 1995, 1998; Vityk et al., 1994). Such comparison is in our case difficult because most  
471 experimental work was carried out at high TP conditions (500-900 °C; 90-300 MPa) and also because only few experiments  
472 were carried out under deviatoric stress conditions that approach those of natural rocks (Diamond et al., 2010; Tarantola et al.,  
473 2010). Despite these limitations, however, some key experimental results provide fundamental constraints on our dataset. First,  
474 both hydrostatic and uniaxial compression experiments showed that in each re-equilibrated FIA a number of inclusions survive  
475 virtually intact the modified post-entrapment PT conditions, showing that only severe deformation brings to total re-  
476 equilibration and complete obliteration of pristine inclusions (i.e.,  $\Delta\sigma > 100$  MPa in uniaxial compression experiments;  $>400$   
477 MPa change of confining P in hydrostatic experiments). Second, under conditions leading to only low to moderate re-  
478 equilibration, the bulk chemical composition of the fluid inclusions does not change significantly from that of the pristine  
479 inclusions.



480 All of this implies that natural quartz samples with microstructures typical of moderate T deformation, such as deformation  
481 lamellae, deformation bands, undulose extinction and bulging, and hosting FIAs with moderately re-equilibrated textures,  
482 should still contain a number of inclusions whose properties resemble those of the pristine fluid. Thus, it is possible that an  
483 aliquot of the 1-5 wt% NaCleq FIAs from Qtz I and II crystals from both the damage zone and fault core is still representative  
484 of the pristine sampled fluid. These inclusions would be those that survived or were relatively less affected by deformation  
485 events postdating their entrapment. Inclusions falling outside the most typical 1-5 wt% NaCleq salinity range would instead  
486 correspond to those that experienced significant H<sub>2</sub>O loss and consequent salinity increase during the successive stages of fault  
487 deformation (cf. Bakker and Jansen, 1990; Diamond et al., 2010). The large documented range of T<sub>tot</sub> lacking a specific mode  
488 observed in individual FIAs is the product of fluid density changes caused by fluid inclusion re-equilibration during post-  
489 entrapment deformation. This would have happened repeatedly and cyclically within the host quartz during all ductile and  
490 brittle stages of deformation of the multi-stage deformation history of BFZ300. The cumulative effect of these cyclic events on  
491 fluid inclusions causes the impossibility to determine the exact T<sub>f</sub> and P<sub>f</sub> at entrapment; however, the ranges of PT values that  
492 approach the true PT conditions can be assessed with some degree of confidence. Therefore, we suggest that the 200-350 °C  
493 T<sub>tot</sub> interval (Fig. 10 e-h) of the 1-5 wt% NaCleq fluid might reflect the characteristic range of the vast majority of damage  
494 zone and fault core fluid. This value overlaps with the 175-350 °C range estimated with the quartz-chlorite geothermometer  
495 (Fig. 11a) and the 220-305 °C range estimated with the sphalerite-stannite geothermometer (Fig. 11b).

496 Fully aware of these limitations, we have combined the microthermometric data of the studied FIAs with the independent  
497 quartz-chlorite and sphalerite-stannite geothermometers to constrain the most probable P<sub>f</sub> during faulting events. With this  
498 approach, we use the formation temperatures of the mineral pairs as independent geothermometers and consider the intersection  
499 between these values and the FIA isochores to derive the ranges of trapping pressure (cf. Roedder and Bodnar, 1980). In Fig.  
500 12, we present the P<sub>f</sub> ranges that are calculated using the entire salinity range of the studied FIAs (cf. Fig. 10); however, we  
501 highlight the most probable P<sub>f</sub> ranges that are consistent with what we consider best preserved salinity range (0-5 wt% NaCleq).  
502 Accordingly, for the damage zone we estimate a P<sub>f</sub> interval of 20-90 MPa (Fig.12a) by intersecting the range of T obtained  
503 from the chlorite-quartz pair in the damage zone Qtz I (T c.170-240 °C, Fig. 11a) with the range of isochores from the same  
504 quartz. As to fluid pressure estimations in the fault core, we combine the 350 °C obtained from the chlorite-quartz pair from the  
505 fault core Qtz I (T>350 °C are outside the calibrated range of the geothermometer) with the ranges of isochores from the same  
506 quartz, from which we obtain P<sub>f</sub> ranging between c. 140 and 120 MPa (Fig. 12b). Similarly, the intersection between the  
507 equilibrium T of the sphalerite-stannite pair in the Qtz II fault core (250-305 °C) and the range of isochores of the Type PS  
508 FIAs of Qtz II (Fig.9) defines P<sub>f</sub> values ranging between 10 and 140 MPa (Fig.12c). Estimations from Type-S4 FIAs (Fig.9)  
509 constrain a range between 40 and 160MPa (Fig. 12d). We propose that these values are sufficiently accurate to constrain  
510 multiple stages of fault slip, each one triggered by a fluid pulse having a distinct pressure. Hence, fault activity started at 200 °C  
511 and at P<sub>f</sub> varying between 20 and 90 MPa and continued through higher temperatures (305-350 °C) and P<sub>f</sub> (120-160 MPa).



## 512 5.2. Structural evolution and fluid flow

513 Based on the integration of field, microstructural, thermometric and fluid inclusions constraints (Table 1), we propose a  
514 conceptual model for the structural evolution of BFZ300 (Fig. 13). The fault's finite strain results from several slip episodes  
515 mediated by multiple events of fluid ingress and fluid-rock interaction. A first constraint provided by our study is that the bulk  
516 chemical composition of the fluids that flowed within the fault did not change significantly during the documented fault  
517 activity, as the best preserved 0-5 wt% NaCleq salinity range points to a compositionally homogeneous fluid. This suggests a  
518 compositionally homogeneous source region of the fluid, or, alternatively, that the studied section of the fault did not interact  
519 with fluids of substantially different composition.

520 The embrittlement of the Olkiluoto metamorphic basement (time  $t_1$  of Fig. 13ab) represents the initial stage of the deformational  
521 history of BFZ300 when conditions for brittle dilation and fracturing of the Paleoproterozoic basement were first met in a  
522 transient fashion. We propose that brittle failure under still ductile environmental conditions was caused by transiently elevated  
523  $P_f$ , as demonstrated by field evidence of hydrofracturing (Figs. 2 and 3) and the pore pressure estimations (Fig. 12 and Table 1).  
524 Hydrofracturing of the host basement is also expressed by the emplacement of Qtz I veins along the diffuse network of joints  
525 and conjugate hybrid/shear fractures of the damage zone (Figs. 13a and 2g). These brittle features are quite evenly distributed  
526 within the damage zone suggesting initial volumetrically diffuse strain distribution. Their formation caused the overall  
527 mechanical weakening of the actively fracturing host rock volume, which in turn facilitated later strain localization. Brittle  
528 structures formed during this stage are discordant to the ENE-WSW striking metamorphic foliation (Fig. 1b), which they cut at  
529 high angle (Fig. 13a). Conditions for tensional and hybrid failure require low differential stress, i.e.  $\sigma_1 - \sigma_3 \sim 4T$ , where  $T$  is the  
530 tensional strength of the rock. Opening of fractures caused a stress drop, sudden increase of permeability, fluid venting and  
531 inhibited further build-up of  $P_f$ . Dilatant fractures were partially infilled by Qtz I, precipitated from a first pulse of the low-  
532 salinity fluid. Crystallization of Qtz I and formation of veins within these fractures caused hardening of the system. The  
533 progressive recovery of shear stresses concomitant with the progressive sealing of dilatant fractures altered the overall  
534 background stress conditions such that failure, after causing initial pure dilation, was accommodated by hybrid extensional  
535 failure and, eventually, by shear fracturing (Fig. 13b), thus forming laterally continuous and interconnected shear fractures  
536 associated to breccia pockets and cataclasites (Figs. 2e and 3bd). Conjugate shear fractures connected the previously formed  
537 extensional fractures through a fracture coalescence mechanism (e.g. Griffith, 1921; Fig. 13a). At the micro-scale this is  
538 demonstrated by the elongated blocky texture of Qtz I crystals from the damage zone (Fig. 11), where crystals grew at high  
539 angle to the vein boundaries (thus suggesting initial near-orthogonal dilation) and are physically connected by cataclastic shear  
540 bands to form a fault-fracture mesh (e.g. Sibson, 1996; Figures 4ab). Cataclastic bands formed at the expense of the migmatitic  
541 host rock are enriched in authigenic, synkinematic sericite, likely due to the interaction between K-feldspar and fluids  
542 circulating in the dilatant fault zone (Fig. 4b). Shear fractures thus deformed the migmatitic host rock to connect dilatant and  
543 mostly Qtz I-filled tension gashes during a continuum of deformation. The conjugate shear fractures ascribable to this stage



544 invariably define tight acute angles (Fig. 2b), which we take as further evidence of overall low differential stress conditions at  
545 the time of failure (Fig. 13b).

546 In synthesis, Qtz I veins from the damage zone are interpreted as the expression of the earliest stage of fault nucleation, before  
547 strain localization affected a progressively narrower rock volume to eventually form the main fault core. Indeed, Qtz I in the  
548 damage zone preserves mostly brittle microstructures and lacks a pervasive ductile overprint, which is instead prevalent within  
549 the fault core. As a consequence, we interpret the chemical properties of the fluid derived from these veins as the closest to the  
550 initial conditions of the first fluid involved in BFZ300 nucleation. Fluid inclusion and geothermometric estimations from the  
551 sinkinematic chlorite crystals associated with the damage zone Qtz I (Figs.5a and 11a), suggest chlorite precipitation at a T of c.  
552 200° C and  $P_f$  between c. 90 and 20 MPa at the time of fault nucleation. Based on geometric, kinematic and deformation style  
553 characteristics, we assign this deformation episode to Stage 1 by Mattila and Viola (2014) (their Fig. 18), i.e. to a discrete brittle  
554 episode that they consider the expression of the earliest onset of brittle conditions in southwestern Finland c. 1.75 Ga ago, under  
555 overall NW-SE to NNW-SSE transpressive conditions.

556 Further deformation of the BFZ300 (time  $t_2$  of Fig. 13c) occurred by progressive inward strain localization and narrowing of the  
557 actively deforming volume of the deformation zone (from a wide damage zone to a narrow fault core). The early BFZ300 core,  
558 consisting of the main Qtz I vein is interpreted as having formed at this stage, within an overall dextral strike-slip kinematic  
559 framework. Emplacement of the Qtz I vein in the core represents the last pulse of this brittle deformational episode (Fig. 13b).  
560 Major fluid venting was likely associated with it, such that the system, once brittle failure in the core had occurred by  
561 hydrofracturing, moved back to a more diffuse deformation style typical of the still prevailing ductile conditions. Microscopic  
562 evidence of ductile deformation by dynamic recrystallization (Fig. 6ab, Table 1) overprinting the early brittle structures of Qtz I  
563 in the fault core supports slow strain rate conditions during deformation. However, this viscous background deformation was  
564 punctuated by renewed and cyclically transient embrittlement as documented by healed fractures shown by trails of secondary  
565 fluid inclusions cutting across both the ductile fabrics and the earlier brittle deformational features (Fig.6c, d and e). Repeated  
566 pulses of high  $P_f$  (120-140 MPa) likely triggered these brittle-ductile oscillations. Repeated fluid ingresses and related  
567 deformation would, in addition, also have caused some of the post-entrapment equilibration of the FI, as discussed above.

568 The cycles of brittle and viscous deformation may be explained as follows. Cyclic brittle failure would have repeatedly lowered  
569  $P_f$ , which lowered the background stress and strain rate and favoured ductile deformation by dynamic recrystallization at  $T >$   
570 300 °C between the slip events (e.g. Passchier and Trow, 2005). The fault regained cohesive strength after each brittle failure  
571 episode through vein formation and sealing/healing of the fracture networks. Porosity destruction by mineral crystallization and  
572 fracture sealing, as clearly shown by CL imaging (Fig 4d), induced a progressive reduction of permeability and mechanical  
573 healing of the fault, which promoted an increase of  $P_f$  and ultimately triggered a new brittle failure. Therefore, pore pressure  
574 build-up promoted episodic brittle fracturing followed by cementation and plastic deformation/recovery. The compelling  
575 evidence for this deformation occurring at  $T \approx 350^\circ$  C indicate that the described processes identify the BDT of the quartz-  
576 feldspathic crust (Kohlstedt et al., 1995).



577 Mattila and Viola (2014) described a second brittle stage (referred to as Stage 2, their Fig. 18) during which a c. N-S to NNE-  
578 SSW-oriented episode of transpressional deformation affected southwestern Finland. Geometric and temporal relationships  
579 between structures of Stages 1 and 2 (see also Viola et al., 2009) were used to infer a clockwise rotation of the horizontal  
580 compression direction from NW-SE (Stage 1) to NNE-SSW (Stage 2). Consistent with the kinematic framework of Stage 2, we  
581 propose here that during progressive regional exhumation and cooling to entirely brittle conditions, the BFZ300 deformation  
582 continued through a further, distinct deformation phase ( $t_3$  of Fig. 13e). This stage accommodated the selective reactivation of  
583 the BFZ300 core, with renewed dilation due to the rotated  $\sigma_1$  during Stage 2 acting subparallel to the strike of the Qtz I vein in  
584 the BFZ300 core. Localised dilation in a still fluid-rich system allowed the emplacement of the Qtz II vein (Fig. 13e). Our  
585 estimations indicate that  $P_f$  and  $T$  conditions at that time were between 140 and 10 MPa and  $T \approx 305^\circ \text{C}$ , respectively. The  
586 BFZ300 core was reactivated under overall hybrid conditions (Fig. 13f), as suggested by the irregular thickness and curved  
587 geometry of the Qtz II vein therein, and by the synkinematic chlorite crystals that are stretched orthogonally to the vein  
588 boundaries (Fig. 3c). The Qtz II vein invariably localized along at the contact between Qtz I and the host rock (Figs. 2, 3 and  
589 13e) suggesting selective reactivation along the pre-existing principal slip zones (Riedel shears and boundary shears,  
590 Tchalenko, 1970), which represented the weakest part of the fault (strength profile Fig. 13h). Evidence for mesoscale hybrid  
591 fracturing and our  $P_f$  estimates (Fig. 11) suggest that  $P_f$  was lower than that of the earlier deformation stages.

592 BFZ300 underwent one or more events of brittle fracturing and induration (Fig.13g), as suggested by CL imaging of Qtz II  
593 crystals (Fig.7c). Fluid pressure estimations for this structural phase are between 160 and 40 MPa.

594 The stylolitic seams having a strike parallel to the BFZ300 fault zone suggest a direction of maximum compression ( $\sigma_1$ )  
595 oriented c. E-W, i.e. subparallel to the inferred Sveconorwegian main shortening direction (e.g., Viola et al., 2011). The  
596 sphalerite-stannite mineral pairs arranged along these structures are supposed to be concentrated through a pression-solution  
597 mechanism during this deformational stage.

598 Skyttä and Torvela (2018) proposed that BFZ300 is a brittle structure localized onto a zone of incomplete structural  
599 transposition inherited from the earlier ductile history of the Olkiluoto basement. However, in our mesoscale and  
600 microstructural analysis we did not find evidence of any ductile precursor, and we note that BFZ300 cuts the ductile structural  
601 grain at high angle, which excludes any reactivation of precursor ductile fabrics.

### 602 5.3. Implications for seismic deformation at the base of the BDTZ

603 This study demonstrates the role of overpressured fluids on strain localisation during the incipient stages of fault nucleation and  
604 subsequent reactivation(s) at the BDTZ. The maximum estimated PT conditions derived in this study (peak conditions of 160  
605 MPa and  $350^\circ \text{C}$ ) are indeed realistic for the base of the seismogenic zone in the continental lithosphere (e.g., Scholz, 1990, and  
606 references therein) where the brittle-ductile transition for quartz occurs.

607 Mechanical models of long-term deformation (Rolandone and Jaupart, 2002) propose that deformation at the brittle-ductile  
608 transition can be reasonably described as being mostly accommodated by intermittent and concomitant coseismic slip and



609 ductile flow. Major hydrofracturing, as that documented in this study by the Qtz I and II veins, is possibly related to seismic  
610 failure. Faults accommodating hydrofracturing are indeed commonly interpreted as seismogenic (e.g. Sibson, 1992a; Cox, 1995)  
611 particularly at depth, where the reactivation of misoriented faults is only possible for fluid pressures exceeding  $\sigma_3$  (e.g. Sibson,  
612 1985).

613 Our study confirms this view because BFZ300 contains not only brittle fault rocks overprinting and overprinted by veins, but  
614 also clearcut evidence of mutually overprinting brittle and ductile deformation (Fig.6). In the light of the field observations  
615 discussed and of the constraints derived, we suggest therefore that BFZ300 behaved in a seismic way at least during the  
616 emplacement of the principal Qtz I and Qtz II veins. Hydrofracture veins are largely interpreted in the literature as the evidence  
617 of earthquake in fluid-rich faults (Cox, 1995).

618 In this perspective, two possible scenarios can be considered to explain the genetic relationships between BFZ300 and a  
619 possible seismic behaviour of the crust during the Svecofennian orogeny. In a first scenario, the quartz veins of the fault core  
620 would represent the result of coseismic rupture during the mainshocks of a fully developed seismic cycle. Pore pressure  
621 fluctuations caused the repeated transient embrittlement of the rock mass, which was otherwise under overall ductile conditions.  
622 The documented brittle-ductile cycles are thus the expression of coseismic fracturing and aseismic creep between the individual  
623 shocks, as shown by viscous deformation overprinting the brittle features, guided by the residual differential stress.

624 A second possibility is that faulting occurred in the absence of a well-defined sequence of main- and aftershocks. As in the case  
625 of man-induced earthquakes triggered by high-pressure fluids during injection of fluids (e.g. Healy et al., 1968), where  
626 deformation is typically accommodated by diffuse swarms of low magnitude seismicity rather than well-defined mainshock-  
627 aftershock sequences (Cox, 2016), we propose that BFZ300 might have localised strain by diffuse veining with crack and seal  
628 textures (Cox, 2016). Breccias and cataclasites (Figs 3 and 8) mutually overprinting with veins show that failure and veining  
629 were indeed broadly coeval (e.g. Cox, 1995; Cox, 2016). Healing in fluid-rich environments can occur over short periods of  
630 time (days-months) when compared with recurrence time of large earthquakes (10-100 years) (Olsen et al., 1998; Tenthorey  
631 and Cox, 2006). Therefore, the documented repeated switches between brittle and ductile deformations would then be steered  
632 again by transient episodes of fluid overpressuring but in this case would express the accommodation of swarms of minor  
633 background earthquakes within overall ductile conditions.

634 Microstructures of fault-rocks exhumed from the brittle-ductile transition in other geological settings, are mostly in agreement  
635 with our hypotheses of seismic deformation. Transient and short term high-stress deformation followed by phases of stress  
636 relaxation, which is prevalently characterized by recovery and recrystallization processes, has been documented by several  
637 authors in deformed quartz (Trepmann and Stöckhert, 2003; Trepmann et al., 2007; Bestmann et al., 2012; Trepmann and  
638 Stöckhert, 2013; Trepmann et al., 2017).

639 To conclude, BFZ300 represents an interesting case of likely seismic deformation within a fluid rich system at the base of the  
640 seismogenic crust. The absence of later, thoroughgoing and high-strain, potentially obliterating deformation episodes allows the  
641 documentation of a complex structural evolution, from the earliest localisation to the mature structural stage.





## 642 **6 Conclusions**

643 Our analysis shows that a multi-disciplinary, multi-technique study of faulting initiation and evolution has indeed the potential  
644 to provide useful insights into the complex and cyclic processes of fluid-fault interaction and effects thereof at the base of the  
645 seismogenic crust. It further constrains, moreover, the importance of cyclic seismicity and fluids in the fragmentation of  
646 Precambrian cratons when deformed at the brittle-ductile transition zone, something that is not yet that well understood for the  
647 Fennoscandian Shield. Our study, moreover, provides potentially important inputs to many modern geological applications,  
648 including site characterization of deep geological disposal facilities for spent nuclear fuel. Results from the detailed geological  
649 characterization of faults at the Olkiluoto site can thus be used toward the continuous updating of the geological site description  
650 and yield further constraints on the mechanics of faulting at those conditions and at that time.

651

## 652 **References**

653 Aaltonen, I., Lahti, M., Engström, J., Mattila, J., Paananen, M., Paulamäki, S., Gehör, S., Kärki, A., Ahokas, T., Torvela,  
654 T. and Front, K.: Geological model of the Olkiluoto site, Version 2.0, Posiva Working Report 2010- 70, Posiva Oy,  
655 Eurajoki, 2010.

656 Aaltonen, I., Engström, J., Front, K., Gehör, S., Kosunen, P. and Kärki, A.: Geology of Olkiluoto. Posiva Working  
657 Report 2016- 16., Posiva Oy, Eurajoki., 2016.

658 Andersen, T., Austrheim, H. and Burke, E. A. J.: Fluid inclusions in granulites and eclogites from the Bergen Arcs,  
659 Caledonides of W. Norway, *Mineral. Mag.*, 54, 145–158, 1990.

660 Ault, A. K. and Selverstone, J.: Microtextural constraints on the interplay between fluid-rock reactions and deformation,  
661 *Contrib. to Mineral. Petrol.*, 156(4), 501–515, doi:10.1007/s00410-008-0298-9, 2008.

662 Bakker, R.: Re-Equilibration Processes in Fluid Inclusion Assemblages, *Minerals*, 7(7), 117, doi:10.3390/min7070117,  
663 2017.

664 Bakker, R. J. and Jansen, J. B. H.: Preferential water leakage from fluid inclusions by means of mobile dislocations,  
665 *Nature*, 345(6270), 58–60, doi:10.1038/345058a0, 1990.

666 Bakker, R. J. and Jansen, J. B. H.: Experimental post-entrapment water loss from synthetic CO<sub>2</sub>-H<sub>2</sub>O inclusions in  
667 natural quartz, *Geochim. Cosmochim. Acta*, 55(8), 2215–2230, doi:10.1016/0016-7037(91)90098-P, 1991.

668 Bakker, R. J. and Jansen, J. B. H.: A mechanism for preferential H<sub>2</sub>O leakage from fluid inclusions in quartz, based on  
669 TEM observations, *Contrib. to Mineral. Petrol.*, 116(1–2), 7–20, doi:10.1007/BF00310686, 1994.

670 Barton, P. B. and Bethke, P. M.: Chalcopyrite disease in sphalerite: Pathology and epidemiology, *Am. Mineral.*, 72(5–  
671 6), 451–467, 1987.

672 Basson, I. J. and Viola, G.: Passive kimberlite intrusion into actively dilating dyke-fracture arrays: Evidence from fibrous

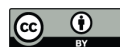

- 673 calcite veins and extensional fracture cleavage, *Lithos*, 76(1–4 SPEC. ISS.), 283–297, doi:10.1016/j.lithos.2004.03.041,  
674 2004.
- 675 Bestmann, M., Pennacchioni, G., Nielsen, S., Göken, M. and de Wall, H.: Deformation and ultrafine dynamic  
676 recrystallization of quartz in pseudotachylyte-bearing brittle faults: A matter of a few seconds, *J. Struct. Geol.*, 38, 21–38,  
677 doi:10.1016/j.jsg.2011.10.001, 2012.
- 678 Bodnar, R. J.: The origin of fluid inclusions, in: Samson, I., Anderson, A. & Marshall, D. (eds.) *Fluid inclusions:*  
679 *Analysis and Interpretation*. Vancouver, Canada: Mineralogical Association of Canada, 11–18, 2003a.
- 680 Bodnar, R. J.: Re-equilibration of fluid inclusions, in: Samson, I., Anderson, A. & Marshall, D. (eds.) *Fluid inclusions:*  
681 *Analysis and Interpretation*. Vancouver, Canada: Mineralogical Association of Canada, 213–230, 2003b.
- 682 Bons, P. D.: The formation of large quartz veins by rapid ascent of fluids in mobile hydrofractures, *Tectonophysics*,  
683 336(1–4), 1–17, doi:10.1016/S0040-1951(01)00090-7, 2001.
- 684 Bons, P. D., Elburg, M. A. and Gomez-Rivas, E.: A review of the formation of tectonic veins and their microstructures, *J.*  
685 *Struct. Geol.*, 43, 33–62, doi:10.1016/j.jsg.2012.07.005, 2012.
- 686 Boullier, A. M.: Fluid inclusions: Tectonic indicators, *J. Struct. Geol.*, 21(8–9), 1229–1235, doi:10.1016/S0191-  
687 8141(99)00039-5, 1999.
- 688 Bourdelle, F. and Cathelineau, M.: Low-temperature chlorite geothermometry: a graphical representation based on a T–  
689 R<sub>2+</sub>–Si diagram, *Eur. J. Mineral.*, 27(5), 617–626, doi:10.1127/ejm/2015/0027-2467, 2015.
- 690 Caine, J. S., Evans, J. P. and Forster, C. B.: Fault zone architecture and permeability structure, *Geology*, 24(11), 1025–  
691 1028, doi:10.1130/0091-7613(1996)024<1025, 1996.
- 692 Compton, K. E., Kirkpatrick, J. D. and Holk, G. J.: Cyclical shear fracture and viscous flow during transitional ductile–  
693 brittle deformation in the Saddlebag Lake Shear Zone, California, *Tectonophysics*, 708, 1–14,  
694 doi:10.1016/j.tecto.2017.04.006, 2017.
- 695 Cox, S. F.: Faulting processes at high fluid pressures: An example of fault valve behavior from the Wattle Gully Fault,  
696 Victoria, Australia, *J. Geophys. Res.*, 100(B7), 841–859, 1995.
- 697 Cox S. F.: Coupling between deformation, fluid pressures and fluid flow in ore-producing hydrothermal environments,  
698 *Econ. Geol.*, 100th Anniversary Volume, 39–75, 2005.
- 699 Cox, S. F.: Injection-driven swarm seismicity and permeability enhancement: Implications for the dynamics of  
700 hydrothermal ore systems in high fluid-flux, overpressured faulting regimes - An invited paper, *Econ. Geol.*, 111(3),  
701 559–587, doi:10.2113/econgeo.111.3.559, 2016.
- 702 Cox, S., Knackstedt, M., & Braun, J.: Principles of structural control on permeability and fluid flow in hydrothermal  
703 systems, *Reviews in Econ. Geol.*, 14, 1–24, 2001.
- 704 Crider, J. G. and Peacock, D. C. P.: Initiation of brittle faults in the upper crust: A review of field observations, *J. Struct.*  
705 *Geol.*, 26(4), 691–707, doi:10.1016/j.jsg.2003.07.007, 2004.

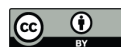

- 706 De Paola, N., Collettini, C., Trippetta, F., Barchi, M. R. and Minelli, G.: A mechanical model for complex fault patterns  
707 induced by evaporite dehydration and cyclic changes in fluid pressure, *J. Struct. Geol.*, 29(10), 1573–1584,  
708 doi:10.1016/j.jsg.2007.07.015, 2007.
- 709 Derez, T., Pennock, G., Drury, M. and Sintubin, M.: Low-temperature intracrystalline deformation microstructures in  
710 quartz, *J. Struct. Geol.*, 71, 3–23, doi:10.1016/j.jsg.2014.07.015, 2015.
- 711 Diamond, L. W.: Introduction to gas-bearing, aqueous fluid inclusions, in : *Fluid Inclusions: Analysis and Interpretation*,  
712 edited by: I. Samson, A. Anderson, D. Marshall, eds., 363–372., 2003.
- 713 Diamond, L. W., Tarantola, A. and Stünitz, H.: Modification of fluid inclusions in quartz by deviatoric stress. II:  
714 Experimentally induced changes in inclusion volume and composition, *Contrib. to Mineral. Petrol.*, 160(6), 845–864,  
715 doi:10.1007/s00410-010-0510-6, 2010.
- 716 Dubessy, J., Buschaert, S., Lamb, W., Pironon, J. and Thiéry, R.: Methane-bearing aqueous fluid inclusions: Raman  
717 analysis, thermodynamic modelling and application to petroleum basins, *Chem. Geol.*, 173(1–3), 193–205,  
718 doi:10.1016/S0009-2541(00)00275-8, 2001.
- 719 Ehlers, C., Lindroos, A. and Selonen, O.: The late Svecofennian granite-migmatite zone of southern Finland-a belt of  
720 transpressive deformation and granite emplacement., *Precambrian Res.*, 64(1–4), 295–309, 1993.
- 721 Fall, A., Donald, R. and Bodnar, R. J.: The effect of fluid inclusion size on determination of homogenization temperature  
722 and density of liquid-rich aqueous inclusions, *Am. Mineral.*, 94(11–12), 1569–1579, doi:10.2138/am.2009.3186, 2009.
- 723 Garofalo, P. S.: Mass transfer during gold precipitation within a vertically extensive vein network (Sigma deposit -  
724 Abitibi greenstone belt - Canada). Part II. Mass transfer calculations, *Eur. J. Mineral.*, 16(5), 761–776, doi:10.1127/0935-  
725 1221/2004/0016-0761, 2004.
- 726 Garofalo, P. S., Matthäi, S. K. & Heinrich, C. A.: Three-dimensional geometry, ore distribution, and time-integrated  
727 mass transfer through the quartz-tourmaline-gold vein network of the Sigma deposit (Abitibi belt - Canada), *Geofluids*, 2,  
728 217-232, 2002.
- 729 Garofalo, P. S., Fricker, M. B., Günther, D., Bersani, D. and Lottici, P.: Physical-chemical properties and metal budget of  
730 Au-transporting hydrothermal fluids in orogenic deposits, *Geol. Soc. London, Spec. Publ.*, 402(1), 71–102,  
731 doi:10.1144/SP402.8, 2014.
- 732 Goddard, J. V. and Evans, J. P.: Chemical changes and fluid-rock interaction in faults of crystalline thrust sheets,  
733 northwestern Wyoming, U.S.A., *J. Struct. Geol.*, 17(4), 533–547, doi:10.1016/0191-8141(94)00068-B, 1995.
- 734 Goldstein, R. H. and Reynolds, T. J.: Fluid Inclusion Microthermometry, *Syst. Fluid Inclusions Diagenetic Miner.*, 87–  
735 121, doi:10.2110/scn.94.31.0087, 1994.
- 736 Gorbatshev, R. and Bogdanova, S.: Frontiers in the Baltic Shield, *Precambrian Res.*, 64(1–4), 3–21, doi:10.1016/0301-  
737 9268(93)90066-B, 1993.
- 738 Griffith, A. A.: The Phenomena of Rupture and Flow in Solids, *Philos. Trans. R. Soc. London*, 221(582–893), 163–198,  
739 1920.



- 740 Guermani, A. and Pennacchioni, G.: Brittle precursors of plastic deformation in a granite: An example from the Mont  
741 Blanc massif (Helvetic, western Alps), *J. Struct. Geol.*, 20(2–3), 135–148, doi:10.1016/S0191-8141(97)00080-1, 1998.
- 742 Healy, J. H., Rubey, W. W., Griggs, D. T. and Raleigh, C. B.: The Denver Earthquakes. Disposal of waste fluids by  
743 injection into a deep well has triggered earthquakes near Denver, Colorado., *Science*, 161(3848), 1301–1310, 1968.
- 744 Heinrich, C. A., Andrew, A. S., and Knill, M. D.: Regional metamorphism and ore formation: Evidence from stable  
745 isotopes and other fluid tracers, *Reviews in Econ Geol*, 11, 97–117, 2000.
- 746 Kaduri, M., Gratier, J. P., Renard, F., Çakir, Z. and Lasserre, C.: The implications of fault zone transformation on  
747 aseismic creep: Example of the North Anatolian Fault, Turkey, *J. Geophys. Res. Solid Earth*, 122(6), 4208–4236,  
748 doi:10.1002/2016JB013803, 2017.
- 749 Kerrich, R.: Some effects of tectonic recrystallisation on fluid inclusions in vein quartz, *Contrib. to Mineral. Petrol.*,  
750 59(2), 195–202, doi:10.1007/BF00371308, 1976.
- 751 Kjøl, H. J., Viola, G., Menegon, L. and Sørensen, B. E.: Brittle-viscous deformation of vein quartz under fluid-rich  
752 lower greenschist facies conditions, *Solid Earth*, 6(2), 681–699, doi:10.5194/se-6-681-2015, 2015.
- 753 Kohlstedt, D. L., Evans, B. and Mackwell, S. J.: Strength of the lithosphere: Constraints imposed by laboratory  
754 experiments, *J. Geophys. Res.*, 100(B9), 587–602, 1995.
- 755 Korja, A., Heikkinen, P. and Aaro, S.: Crustal structure of the northern Baltic Sea palaeorift, *Tectonophysics*, 331(4),  
756 341–358, doi:10.1016/S0040-1951(00)00290-0, 2001.
- 757 Kukkonen, I. T. and Lauri, L. S.: Modelling the thermal evolution of a collisional Precambrian orogen: High heat  
758 production migmatitic granites of southern Finland, *Precambrian Res.*, 168(3–4), 233–246,  
759 doi:10.1016/j.precamres.2008.10.004, 2009.
- 760 Lahtinen, R. and Survey, G.: Palaeoproterozoic tectonic evolution of the Fennoscandian Shield. In: Lehtinen, M., Nurmi,  
761 P.A., Rämö (eds.), *Precambrian Geology of Finland: Key to the Evolution of the Fennoscandian Shield*, *Developments in*  
762 *Precambrian Geology*, 2005.
- 763 Mancktelow, N. S. and Pennacchioni, G.: The control of precursor brittle fracture and fluid-rock interaction on the  
764 development of single and paired ductile shear zones, *J. Struct. Geol.*, 27(4), 645–661, doi:10.1016/j.jsg.2004.12.001,  
765 2005.
- 766 Mattila, J. and Viola, G.: New constraints on 1.7Gyr of brittle tectonic evolution in southwestern Finland derived from a  
767 structural study at the site of a potential nuclear waste repository (Olkiluoto Island), *J. Struct. Geol.*, 67(PA), 50–74,  
768 doi:10.1016/j.jsg.2014.07.003, 2014.
- 769 Menegon, L., Pennacchioni G., Malaspina N., Harris K., and Wood E.: Earthquakes as Precursors of Ductile Shear Zones  
770 in the Dry and Strong Lower Crust, *Geochem. Geophys. Geosy.*, 18(12), doi: 10.1002/2015GC006010, 2017.
- 771 Menegon, L., Marchesini, B., Prando, F., Garofalo, P. S., Viola, G., Anderson, M. and Mattila, J.: Brittle-viscous  
772 oscillations and different slip behaviours in a conjugate set of strike-slip faults, *Geophysical Research Abstracts Vol. 20*,  
773 EGU2018-14799, 2018.



- 774 Miller, S. A.: The Role of Fluids in Tectonic and Earthquake Processes, edited by R. Dmowska, Elsevier., 2013.
- 775 Mittempergher, S., Dallai, L., Pennacchioni, G., Renard, F. and Di Toro, G.: Origin of hydrous fluids at seismogenic  
776 depth: Constraints from natural and experimental fault rocks, *Earth Planet. Sci. Lett.*, 385, 97–109,  
777 doi:10.1016/j.epsl.2013.10.027, 2014.
- 778 Nekrasov, I. J., Sorokin, V. I. and Osadchii, E. G.: Fe and Zn partitioning between stannite and sphalerite and its  
779 application in geothermometry., *Phys. Chem. Earth*, 11(C), 739–742, doi:10.1016/0079-1946(79)90069-7, 1979.
- 780 Oliver, N. H. S. and Bons P. D.: Mechanisms of fluid flow and fluid–rock interaction in fossil metamorphic hydrothermal  
781 systems inferred from vein–wallrock patterns, geometry and microstructure, *Geofluids*, 137–162, 2001.
- 782 Olsen, M. P., Scholz, C. H. and Léger, A.: Healing and sealing of a simulated fault gouge under hydrothermal conditions:  
783 Implications for fault healing, *J. Geophys. Res.*, 103(B4), 7421, doi:10.1029/97JB03402, 1998.
- 784 Passchier, C. W. and Trouw, R. A. J.: *Microtectonics*, 2<sup>nd</sup> edition. Berlin: Springer, 2005.
- 785 Pennacchioni, G., Di Toro, G., Brack, P., Menegon, L. and Villa, I. M.: Brittle-ductile-brittle deformation during cooling  
786 of tonalite (Adamello, Southern Italian Alps), *Tectonophysics*, 427(1–4), 171–197, doi:10.1016/j.tecto.2006.05.019,  
787 2006.
- 788 Roedder, E. and Bodnar, R. J.: Geologic determinations from fluid inclusion studies., *Annu. Rev. Earth Planet. Sci.*,  
789 8(1953), 263–301, 1980.
- 790 Rolandone, F. and Jaupart, C.: The distributions of slip rate and ductile deformation in a strike-slip shear zone, *Geophys.*  
791 *J. Int.*, 148(2), 179–192, doi:10.1046/j.1365-246X.2002.01574.x, 2002.
- 792 Rosso, K. M. and Bodnar, R. J.: Microthermometric and Raman spectroscopic detection limits of CO<sub>2</sub> in fluid inclusions  
793 and the Raman spectroscopic characterization of CO<sub>2</sub>, *Geochim. Cosmochim. Acta*, 59(19), 3961–3975,  
794 doi:10.1016/0016-7037(95)94441-H, 1995.
- 795 Scholz, C. H.: *The Mechanics of Earthquakes and Faulting*, Cambridge: Cambridge University Press, 1990.
- 796 Shimizu, M. and Shikazono, N.: Mineralium deposita ©, *Miner. Depos.*, 20, 314–320, 1985.
- 797 Sibson, R. H.: A note on fault reactivation, *J. Struct. Geol.*, 7(6), 751–754, doi:10.1016/0191-8141(85)90150-6, 1985.
- 798 Sibson, R. H.: Earthquake faulting as a structural process, *J. Struct. Geol.*, 11(1–2), 1–14, doi:10.1016/0191-  
799 8141(89)90032-1, 1989.
- 800 Sibson, R. H.: Fault-valve behavior and the hydrostatic-lithostatic fluid pressure interface, *Earth Sci. Rev.*, 32(1–2), 141–  
801 144, doi:10.1016/0012-8252(92)90019-P, 1992a.
- 802 Sibson, R. H.: Implications of fault-valve behaviour for rupture nucleation and recurrence., *Tectonophysics*, 211(1–4),  
803 283–293., 1992b.
- 804 Sibson, R. H.: Load-strengthening versus load-weakening faulting, *J. Struct. Geol.*, 15(2), 123–128, doi:10.1016/0191-



- 805 8141(93)90090-W, 1993.
- 806 Sibson, R. H.: Structural permeability of fluid-driven fault-fracture meshes-Sibson-J Struct Geol-1996.pdf, , 18(8), 1996.
- 807 Sibson, R. H., Robert, F. and Poulsen, K. H.: High-angle reverse faults, fluid-pressure cycling, and mesothermal gold-  
808 quartz deposits, , 16(June 1988), 551–555, doi:10.1130/0091-7613(1988)016<0551:HARFFP>2.3.CO;2, 1988.
- 809 Siebenaller, L., Vanderhaeghe, O., Jessell, M., Boiron, M. C. and Hibsich, C.: Syntectonic fluids redistribution and  
810 circulation coupled to quartz recrystallization in the ductile crust (Naxos Island, Cyclades, Greece), J. Geodyn., 101,  
811 129–141, doi:10.1016/j.jog.2016.07.001, 2016.
- 812 Skyttä, P. and Torvela, T.: Brittle reactivation of ductile precursor structures: The role of incomplete structural  
813 transposition at a nuclear waste disposal site, Olkiluoto, Finland, J. Struct. Geol., 0–1, doi:10.1016/j.jsg.2018.06.009,  
814 2018.
- 815 Spruzeniece, L. and Piazzolo, S.: Strain localization in brittle-ductile shear zones: Fluid-abundant vs. fluid-limited  
816 conditions (an example from Wyangala area, Australia), Solid Earth, 6(3), 881–901, doi:10.5194/se-6-881-2015, 2015.
- 817 Steele-MacInnis, M., Lecumberri-Sanchez, P. and Bodnar, R. J.: HokieFlincs\_H2O-NaCl: A Microsoft Excel spreadsheet  
818 for interpreting microthermometric data from fluid inclusions based on the PVTX properties of H2O-NaCl, Comput.  
819 Geosci., 49, 334–337, doi:10.1016/j.cageo.2012.01.022, 2012.
- 820 Sterner, S. M. and Bodnar J.: Synthetic fluid inclusions - VII. Re-equilibration of fluid inclusions in quartz during  
821 laboratory-simulated metamorphic burial and uplift, J. Metamorph. Geol., 7, 243–260, 1989.
- 822 Suominen, V.: The chronostratigraphy of southern Finland, with special reference to Postjotnian and Subjotnian diabases.  
823 Bull. Geol. Surv. Finl., 356, 100, 1991.
- 824 Tarantola, A., Diamond, L. W. and Stünitz, H.: Modification of fluid inclusions in quartz by deviatoric stress I:  
825 Experimentally induced changes in inclusion shapes and microstructures, Contrib. to Mineral. Petrol., 160, 825–843,  
826 doi:10.1007/s00410-010-0509-z, 2010.
- 827 Tchalenko, J. S.: Similarities between Shear Zones of Different Magnitudes, Geol. Soc. Am. Bull., 81(6), 1625–1640,  
828 doi:10.1130/0016-7606(1970)81[1625:SBSZOD]2.0.CO;2, 1970.
- 829 Tenthorey, E. and Cox, S. F.: Cohesive strengthening of fault zones during the interseismic period: An experimental  
830 study, J. Geophys. Res. Solid Earth, 111(9), 1–14, doi:10.1029/2005JB004122, 2006.
- 831 Trepmann, C. A. and Stöckhert, B.: Quartz microstructures developed during non-steady state plastic flow at rapidly  
832 decaying stress and strain rate, J. Struct. Geol., 25(12), 2035–2051, doi:10.1016/S0191-8141(03)00073-7, 2003.
- 833 Trepmann, C. A. and Stöckhert, B.: Short-wavelength undulatory extinction in quartz recording coseismic deformation in  
834 the middle crust &ndash; An experimental study, Solid Earth, 4(2), 263–276, doi:10.5194/se-4-263-2013, 2013.
- 835 Trepmann, C. A., Stöckhert, B., Dörner, D., Moghadam, R. H., Küster, M. and Röller, K.: Simulating coseismic  
836 deformation of quartz in the middle crust and fabric evolution during postseismic stress relaxation - An experimental  
837 study, Tectonophysics, 442(1–4), 83–104, doi:10.1016/j.tecto.2007.05.005, 2007.





- 838 Trepmann, C. A., Hsu, C., Hentschel, F., Döhler, K., Schneider, C. and Wichmann, V.: Recrystallization of quartz after  
839 low-temperature plasticity – The record of stress relaxation below the seismogenic zone, *J. Struct. Geol.*, 95, 77–92,  
840 doi:10.1016/j.jsg.2016.12.004, 2017.
- 841 van den Kerkhof, A., Kronz, A. and Simon, K.: Deciphering fluid inclusions in high-grade rocks, *Geosci. Front.*, 5(5),  
842 683–695, doi:10.1016/j.gsf.2014.03.005, 2014.
- 843 Viola, G., Mancktelow, N. S. and Miller, J. A.: Cyclic frictional-viscous slip oscillations along the base of an advancing  
844 nappe complex: Insights into brittle-ductile nappe emplacement mechanisms from the Naukluft Nappe Complex, central  
845 Namibia, *Tectonics*, 25(3), 1–20, doi:10.1029/2005TC001939, 2006.
- 846 Viola, G., Venvik Ganerød, G. and Wahlgren, C. H.: Unraveling 1.5 Ga of brittle deformation history in the Laxemar-  
847 Simpevarp area, southeast Sweden: A contribution to the Swedish site investigation study for the disposal of highly  
848 radioactive nuclear waste, *Tectonics*, 28(5), 1–29, doi:10.1029/2009TC002461, 2009.
- 849 Viola, G., Mattila, J., Zwingmann, H., Todd, A. and Raven, M.: Structural and K / Ar Illite Geochronological Constraints  
850 on the Brittle Deformation History of the Olkiluoto Region , Southwest Finland Structural and K / Ar Illite  
851 Geochronological Constraints on the Brittle Deformation History of the Olkiluoto Region , 2011.
- 852 Viola, G., Scheiber, T., Fredin, O., Zwingmann, H., Margreth, A. and Knies, J.: Deconvoluting complex structural  
853 histories archived in brittle fault zones, *Nat. Commun.*, 7, 1–10, doi:10.1038/ncomms13448, 2016.
- 854 Vityk, M. O. and Bodnar, R. J.: Textural evolution of synthetic fluid inclusions in quartz during reequilibration, with  
855 applications to tectonic reconstruction, *Contrib. to Mineral. Petrol.*, 121(3), 309–323, doi:10.1007/BF02688246, 1995.
- 856 Vityk, M. O. and Bodnar, R. J.: Statistical microthermometry of synthetic fluid inclusions in quartz during  
857 decompression reequilibration, *Contrib. to Mineral. Petrol.*, 132(2), 149–162, doi:10.1007/s004100050413, 1998.
- 858 Vityk, M. O., Bodnar, R. J. and Schmidt, C. S.: Fluid inclusion as a tectonothermobarometers: Relation between  
859 pressure-temperature history and reequilibration morphology during crystal thickening, *Geology*, 22, 731–734,  
860 doi:10.1130/0091-7613(1994)022<0731:FIATRB>2.3.CO, 1994.
- 861 Wehrens, P., Berger, A., Peters, M., Spillmann, T. and Herwegh, M.: Deformation at the frictional-viscous transition:  
862 Evidence for cycles of fluid-assisted embrittlement and ductile deformation in the granitoid crust, *Tectonophysics*, 693,  
863 66–84, doi:10.1016/j.tecto.2016.10.022, 2016.
- 864 Wilkins, R. W. T. and Barkas, J. P.: Geological History and its Impact on the Rock Mechanics Properties of the Olkiluoto  
865 Site. Working Report 2006-14, *Contrib. to Mineral. Petrol.*, 65, 293–299, 1978.
- 866
- 867
- 868

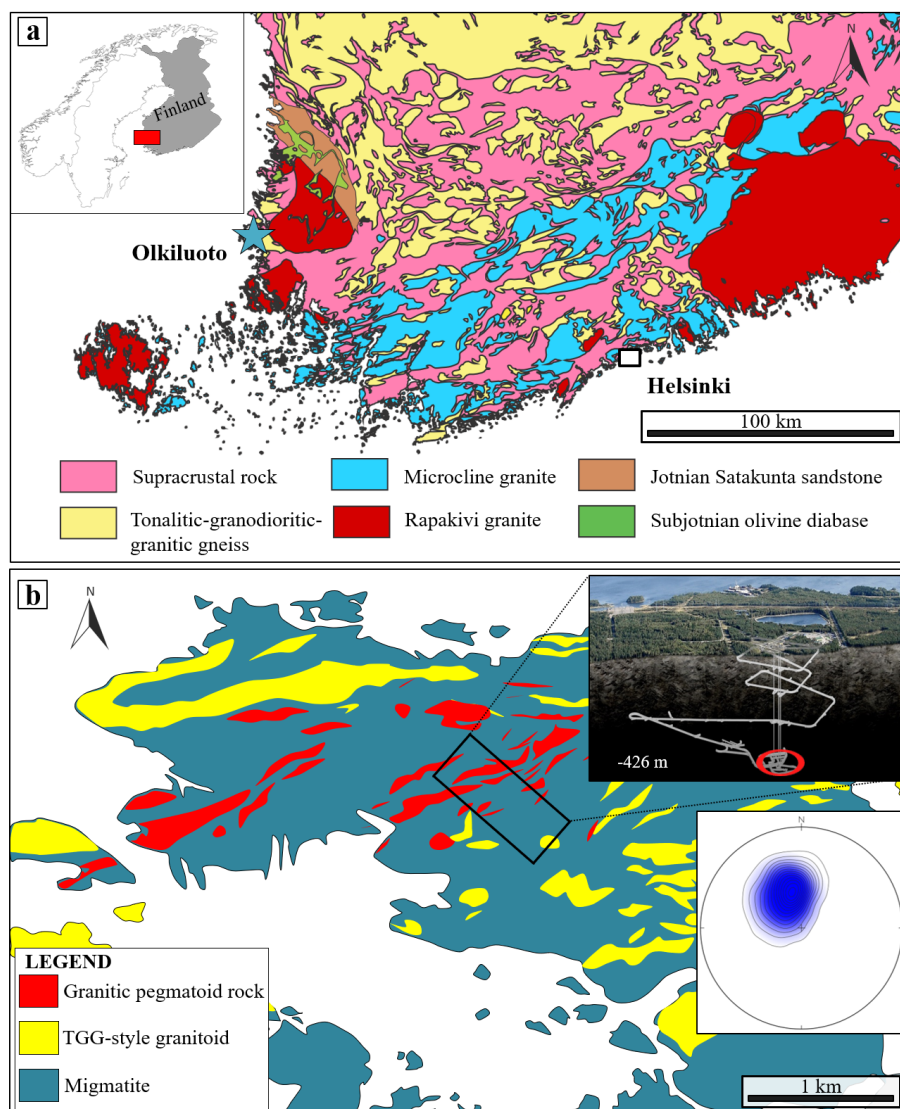

869

870 Figure 1. (a) Simplified geological map of Southern Finland Subprovince (modified after: Mattila and Viola 2014). (b) Geological sketch of  
 871 the Olkiluoto site. The upper inset on the right is a panoramic photo with an overlay drawing of the underground infrastructure (photo:  
 872 courtesy of Posiva Oy, Finland). The red circle shows the depth location of BFZ300. The lower inset on the right shows the poles to foliation  
 873 planes measured from the Olkiluoto drill cores (Mattila and Viola, 2014). This is mainly low-angle and SE-dipping.

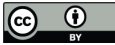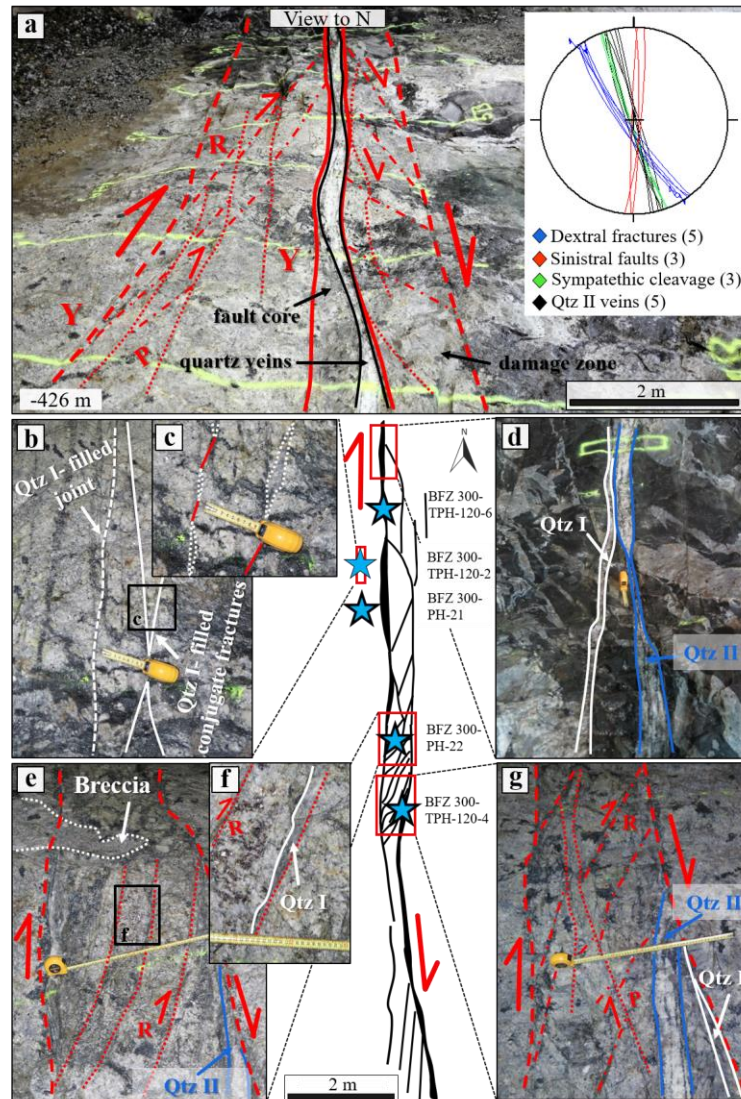

874

875 Figure 2. BFZ300 fault geometry and architecture (centre of figure) and examples of representative outcrop features. The red rectangles locate  
 876 the areas along the fault segments where detailed outcrop photos were taken. Stars locate hand and drill core samples. Stars with black layout  
 877 identify samples used for the microthermometric study. Note that the fault is made of two segments offset laterally at a **step** over zone with  
 878 overall dextral kinematics. Fault core quartz veins are shown by thicker black lines in the schematic model. (a) View and interpretation of the  
 879 structural elements of the fault, whose core hosts two generations of quartz-chlorite veins. Inset shows lower-hemisphere, equiangular  
 880 projection of conjugate fault segments, cleavage and quartz-chlorite veins. (b) Damage zone made of mm-thick, en-echelon veins connected by  
 881 conjugate shear segments. (c) Detail of (b) showing fractures filled by the first quartz generation (Qtz I). (d) Two distinct generations of  
 882 quartz-chlorite veins recognised in the fault core (Qtz I and Qtz II). (e) Detail of the compressional step-over zone characterized by multiple  
 883 and parallel T fractures, filled by Qtz I. A brecciated body is crosscut by the Y planes. (f) Detail of a Tensional fracture infilled by Qtz I. (g)  
 884 Compressional structures (P shears) from the step-over zone and relationships between Qtz I and Qtz II within the fault. The Riedel geometry  
 885 suggests that the Qtz II vein formed due to the reactivation of the principal slip zones..



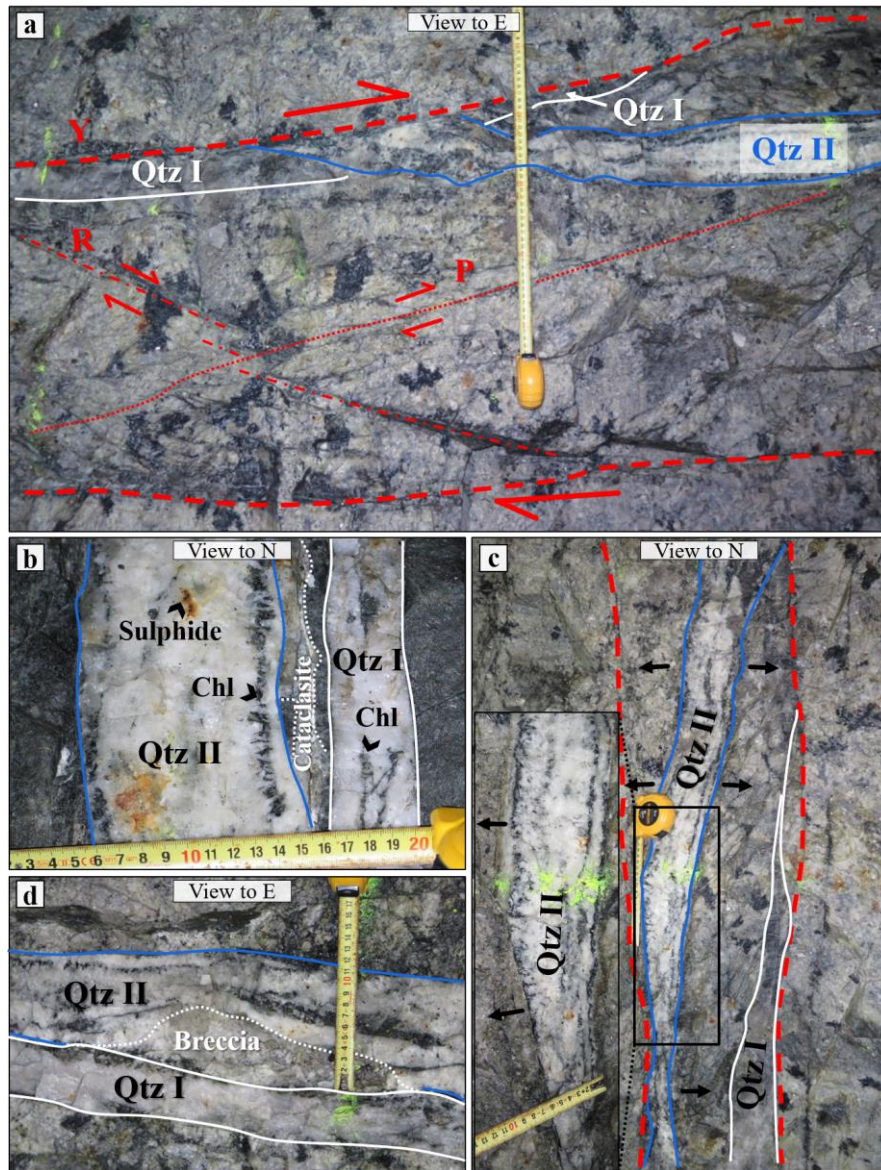

886

887 Figure 3. Relationships between Riedel shears and quartz-chlorite veins. (a) Sharp shear boundaries along fault veins and Riedel shears. The  
888 geometry of the R and P shears suggests a dextral kinematics. White lines highlight the positions of the two types of quartz veins. Note the Qtz  
889 II vein cutting the Qtz I vein. (b) Juxtaposed Qtz I and Qtz II veins. Qtz I veins are thinner and made of a translucent, small grained quartz. In  
890 contrast, Qtz II veins, which contain pockets of sulphide aggregates, are thicker and made of larger and euhedral quartz. Chlorite occurs as  
891 a minor phase in both types of veins, but only in Qtz II veins it forms long and prismatic aggregates growing perpendicular to the fracture walls.  
892 In Qtz I veins, chlorite is small grained and forms thin levels within the quartz. Notice the presence of a cataclastic band between the two  
893 veins. (c) Spatial continuity of the chlorite aggregates within the Qtz II veins, which grow always orthogonal to the vein boundaries. Inset  
894 shows the detail of the prismatic aggregates forming long and parallel ribbons. This open space filling texture suggests hybrid conditions of  
895 reactivation of the older Qtz I veins. (d) Small quartz breccia formed between the two generations of quartz veins.

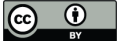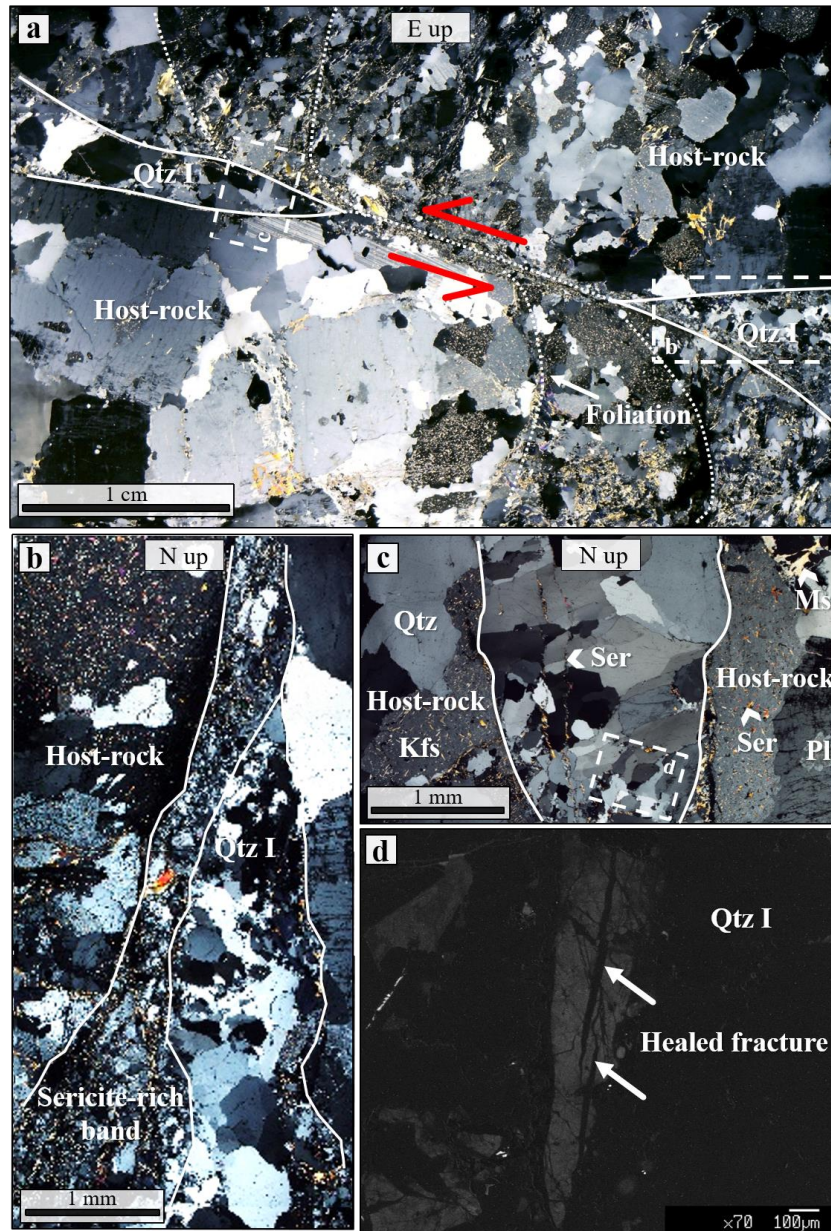

896

897 Figure 4. Microtextural characteristics of Qtz I from the damage zone of BFZ300 (sample: TPH-120-2). (a) Composition of photomicrographs  
898 of a Qtz I vein interconnecting with a sinistral shear band (crossed nicols). Faulting kinematics is suggested by drag folds in the host rock. (b)  
899 Tip of Qtz I vein hosted by a sericite-rich cataclastic band of the host rock. (c) Detail of panel (a) showing open-space filling texture in the Qtz I  
900 vein. Notice the sericite microfractures crosscutting Qtz I. (d) Panchromatic cathodoluminescence image of Qtz I showing healed  
901 microfractures crosscutting the crystal.

902

903



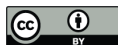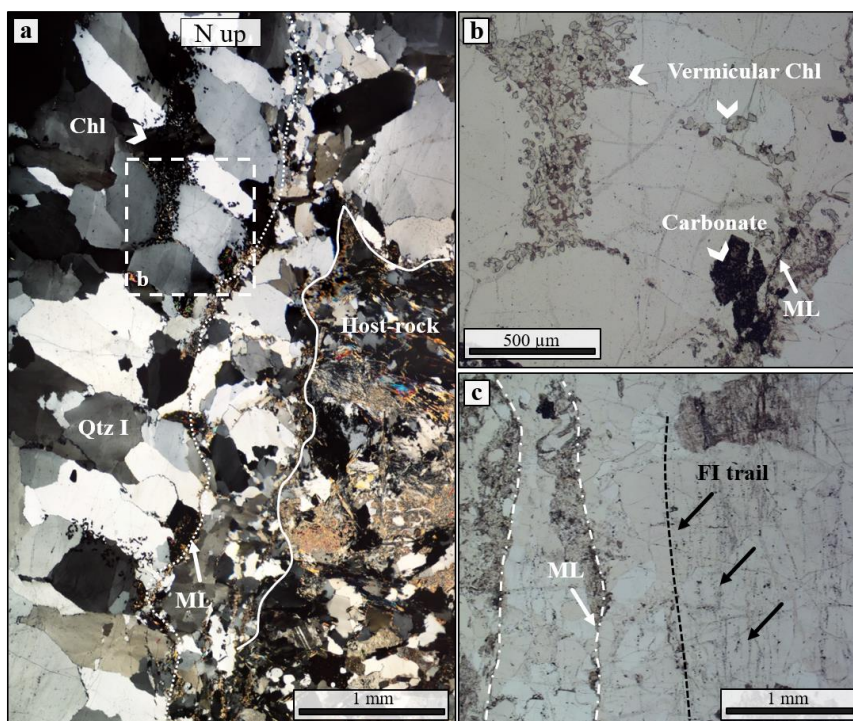

904

905 Figure 5. Microtextural characteristics of Qtz I from the damage zone of BFZ300 (sample PH-21). (a) Stacked microphotographs of a Qtz I  
906 vein showing elongated-blocky texture with crystals growing obliquely with respect to the vein boundaries, which suggests growth under  
907 oblique dilation. Mode I opening is highlighted by the presence of a median line (ML) that is decorated by syn-kinematic chlorite and  
908 aggregates of REE-bearing carbonate. (b) Detailed view of the chlorite and carbonate found along the ML. (c) Photomicrograph (plane  
909 polarized light) showing a set of fluid inclusion trails parallel to the median lines and crosscutting Qtz I, which suggests crack-seal opening  
910 and sealing.



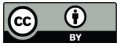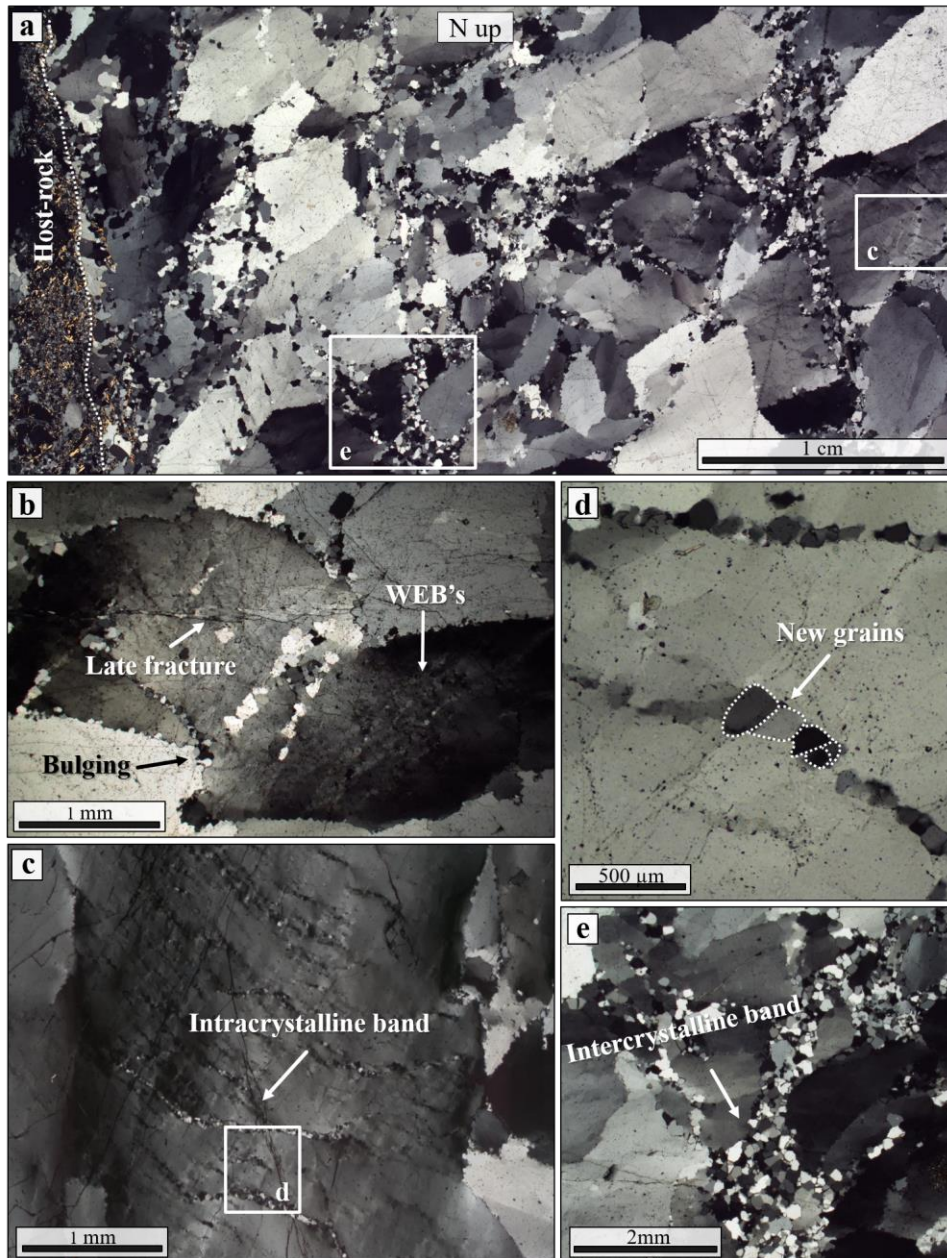

911  
912 Figure 6. Microtextural characteristics of Qtz I from the BFZ300 core (sample TPH-120-4). (a) Stacked photomicrographs showing the typical  
913 heterogeneous grain size of Qtz I (30-800  $\mu\text{m}$ ). (b) Evidence of plastic deformation of Qtz I from the fault core given by bulging of the largest  
914 crystals, wide extinction bands and undulose extinction. Note the late brittle fractures crosscutting all the previously formed plastic features.  
915 (c) Intracrystalline deformation bands within a large crystal. (d) Detail of (c) showing the typical grain size of the band (50-250  $\mu\text{m}$ ).  
916 Intracrystalline deformation bands are oriented at  $<30^\circ$  with respect to the BFZ300 vein walls and can be up to 2 mm in length. (e)  
917 Intercrystalline deformation band showing a thickening at the triple junction of larger grains. These intercrystalline bands are parallel to the  
918 strike of BFZ300.

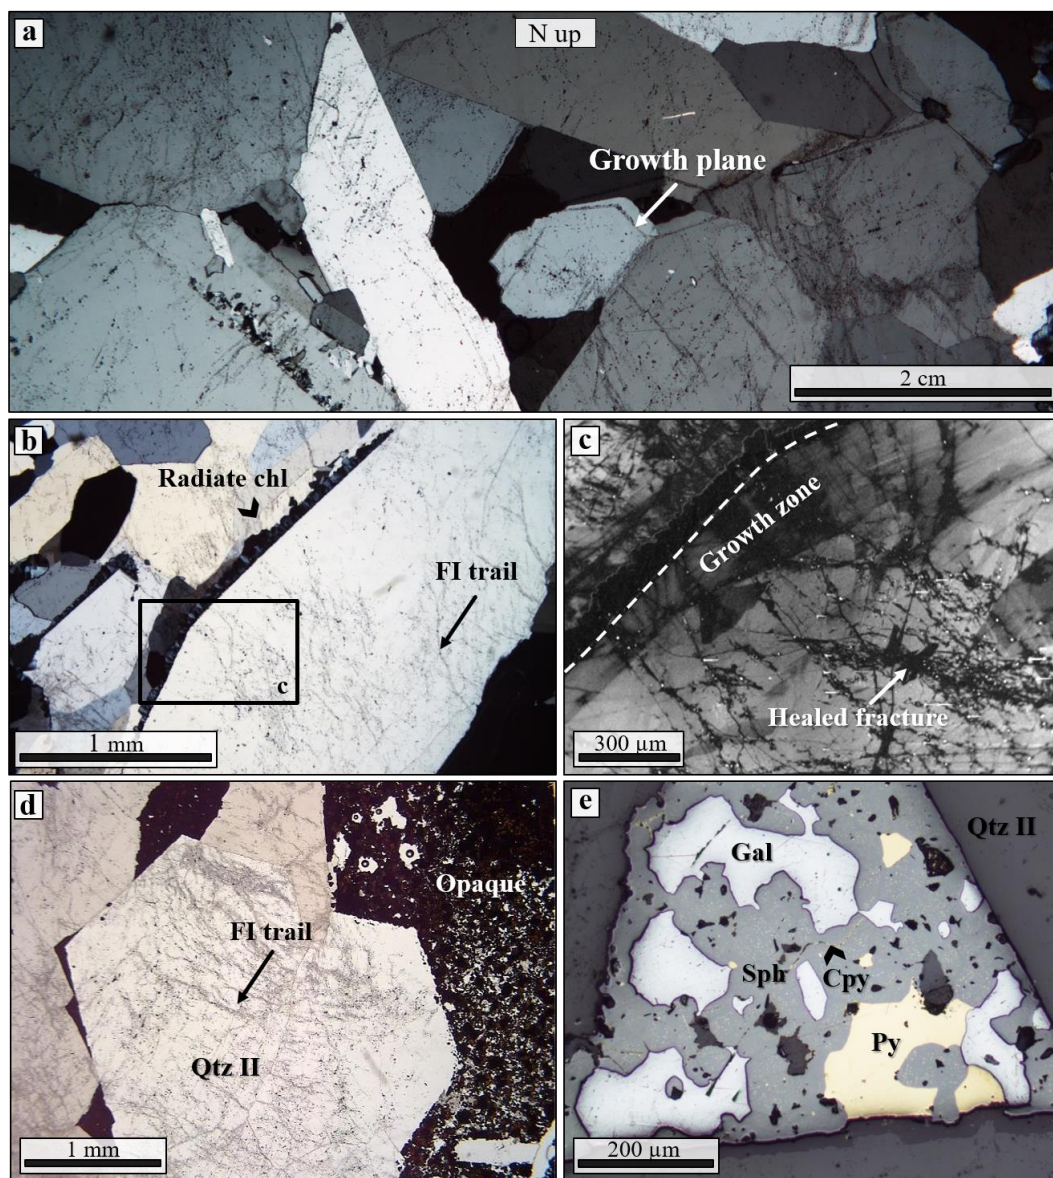

919

920 Figure 7. Microstructural characteristics of Qtz II from BFZ300 (samples TPH-120-6, PH-22). (a) Stretched photomicrographs of Qtz II vein  
921 from the fault core. Notice the coarse quartz crystals and their elongated-blocky texture. Primary growth textures are sometimes visible and are  
922 marked by solid inclusions and decrepitated FIAs. (b) Radiate chlorite crystals along a prismatic Qtz II crystal boundary. Note that Qtz II is  
923 crosscut by numerous trails of FIs. (c) Panchromatic cathodoluminescence image of the same large Qtz II crystal from panel b, showing radiate  
924 chlorite along the crystal boundary and a primary growth zone cut by a set of healed fractures. (d) Euhedral quartz crystals set within opaque  
925 phases and crosscut by a network of thin microfractures. (e) Reflected light photomicrograph showing the opaque mineral assemblage  
926 typically associated with Qtz II, i.e. subhedral to anhedral sphalerite, pyrite, and galena. Chalcopyrite is a minor phase and occurs as small  
927 round inclusions within sphalerite (chalcopyrite “disease”) or as large subhedral/anhedral masses together with galena.



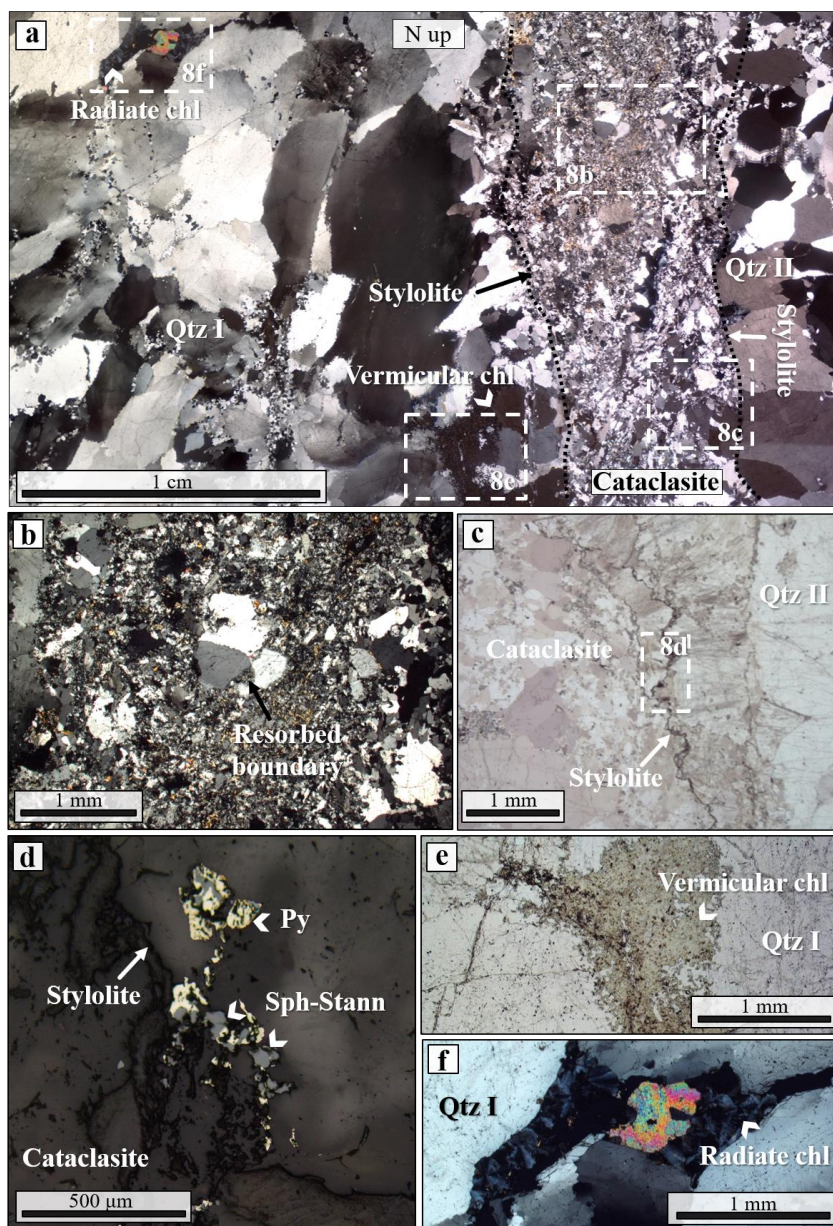

928

929 Figure 8. Microtextural characteristics of the cataclasite juxtaposing Qtz I and Qtz II veins (sample TPH-120-4). (a) Stitched  
 930 photomicrographs covering the contact between the two quartz veins and the intervening, 5 mm-thick cataclastic band. (b) Cataclastic band  
 931 made of large Qtz I fragments (8-12 mm) embedded within a finer matrix (20-200 μm in size) made of sericite and quartz. The largest crystals  
 932 show lobate boundaries, suggesting dissolution and local resorption along the clast-matrix interface. (c) Detail view of the cataclastic band,  
 933 which is defined by two stylolite seams that strike parallel to the BFZ300. (d) Reflected-light photomicrograph showing anhedral to subhedral  
 934 pyrite, chalcopyrite, stannite, and sphalerite arranged along the stylolite as residual product of pressure solution. (e) Vermicular chlorite  
 935 associated with Qtz I close to the cataclastic band. (f) Radiate chlorite associated with Qtz I.  
 936

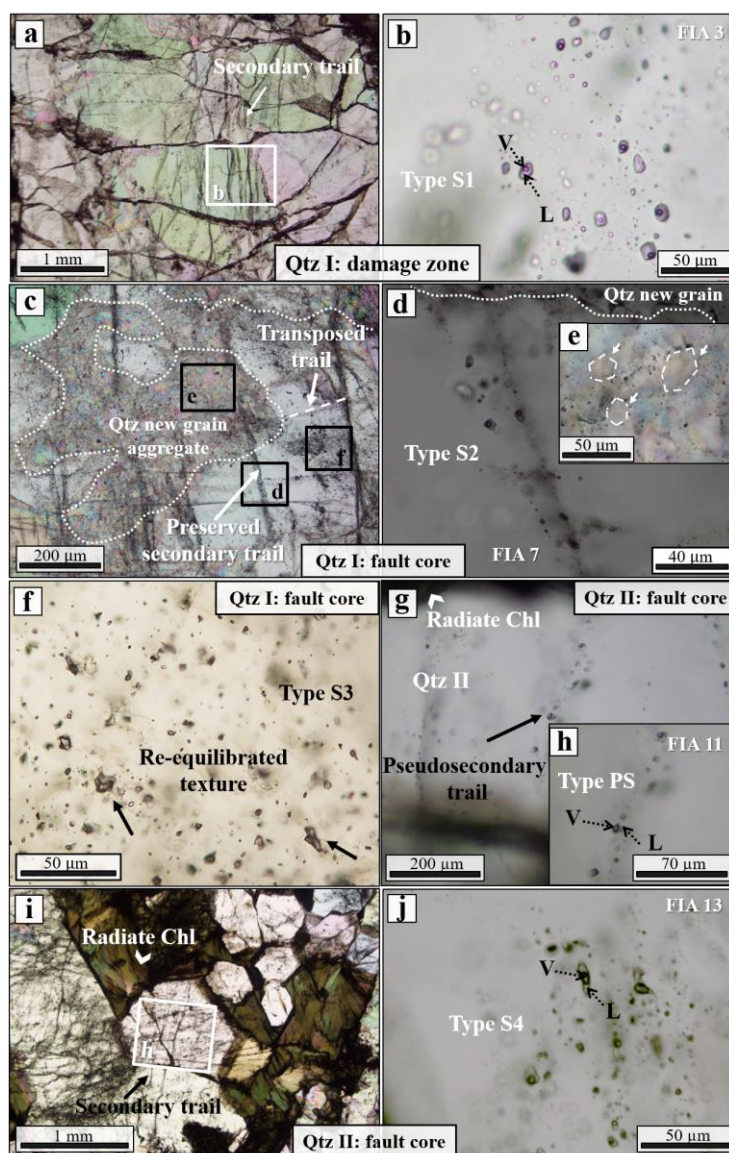

937

938 Figure 9. Characteristics textures of FIAs hosted within the BFZ300 quartz (samples PH-21, TPH-120-4, TPH-120-6). (a) Secondary trails  
 939 crosscutting large Qtz I crystals of the damage zone. (b) Detail of (a) showing the phase ratios of one of the studied secondary assemblages  
 940 (FIA3), most representative of Type S1 FIA. (c) Long secondary transgranular trails crosscutting Qtz I of the fault core, dismembered by  
 941 intercrystalline fractures, infilled by quartz new grains. Qtz I fault core also hosts set of short sub-trails developed at high angle with respect to  
 942 the long trails. (d) Detail of Type S2 FIA entrapped along a preserved secondary fracture trail. (e) Small inclusions (<1μm) arranged along the  
 943 boundaries of new polygonal quartz. (f) Example of Type S3 FIA arranged as isolated clusters inside ductile deformed fault core Qtz I. These  
 944 trails formed during a brittle deformation stage that pre-dates ductile re-crystallization. (g) Pseudosecondary FIA associated with Qtz II-  
 945 chlorite (FIA11) and (h) its phase ratio details. (i) Small scale view of secondary FIAs crosscutting Qtz II. (j) Detail of secondary trails  
 946 crosscutting euhedral Qtz II (FIA 13). In all photographs north points up.

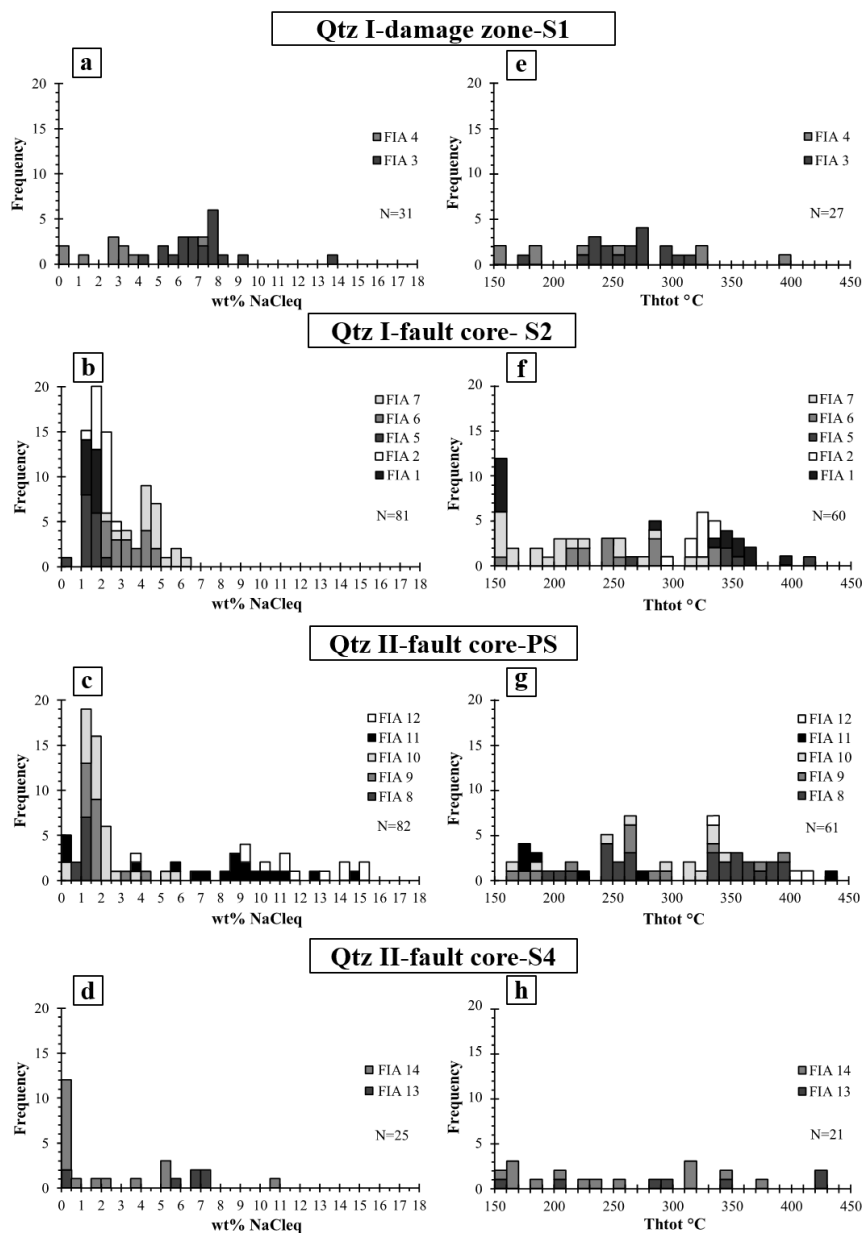

947  
 948 Figure 10. Microthermometric data of the studied FIAs. Panels a-d show the bulk salinities of individual FIAs calculated from the  $T_{mice}$  data  
 949 while panels e-h refer to the temperatures of final homogenization of the same assemblages. Notice that the data report the properties of  
 950 individual FIAs according to their occurrence within Qtz I of the damage zone, Qtz I from the fault core, and Qtz II from the fault core. Notice  
 951 that pseudosecondary (PS) and secondary (S) FIAs identify progressive later stages of fluid entrapment, and can be used to constrain the fluid  
 952 properties in the fault zone. Notice also that the measured ranges of  $T_{htot}$  spread across T intervals that are too large to represent entrapment at  
 953 equilibrium (e.g., FIA7 of Qtz I from fault core: 150-330 °C), which suggests post-entrapment re-equilibration of the inclusions. Fluid bulk  
 954 composition is expressed as salinity, which is conventionally reported as weight percent of NaCl equivalents (wt%NaClea, Roedder,1984).  
 955





956

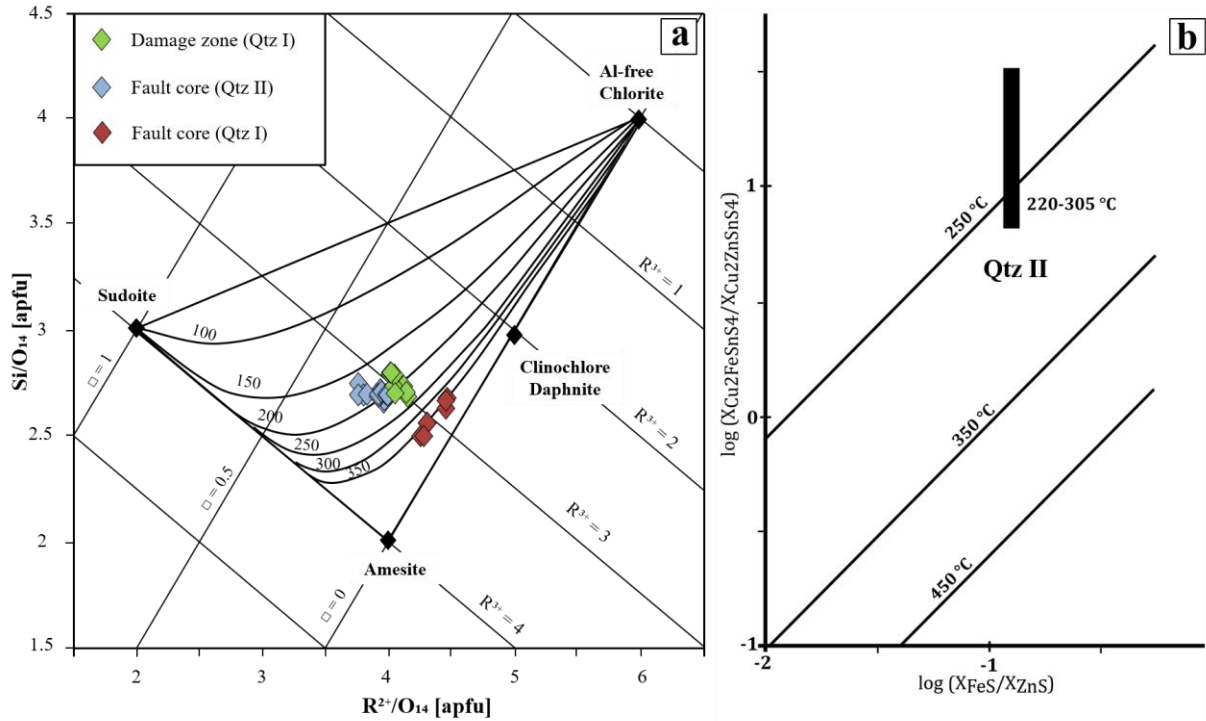

957

958 Figure 11. Mineral-pair geothermometry applied to the assemblages of the QtzI- and Qtz II veins.  
 959 estimated using the method of Bourdelle and Cathelineau (2015). Green, red, and light blue symbols indicate the distinct textural types of  
 960 chlorite in Qtz I and II, respectively. The maximum temperature is from the Qtz I-chlorite pair from the fault core. The other groups of  
 961 chlorites in the 150-250 °C range indicate a second stage of quartz-chlorite precipitation in the fault core and damage zone, in line with  
 962 microthermometric constraints. (b) Temperature of sphalerite-stannite formation estimated with the method of Shimizu & Shikazono (1985)  
 963 that uses Fe and Zn partitioning between stannite and sphalerite. The region of the plot that was calibrated with this geothermometer lies  
 964 between the 250 and 450 °C isotherms. Hence, compositions corresponding to T<250 °C should be interpreted with caution.  
 965



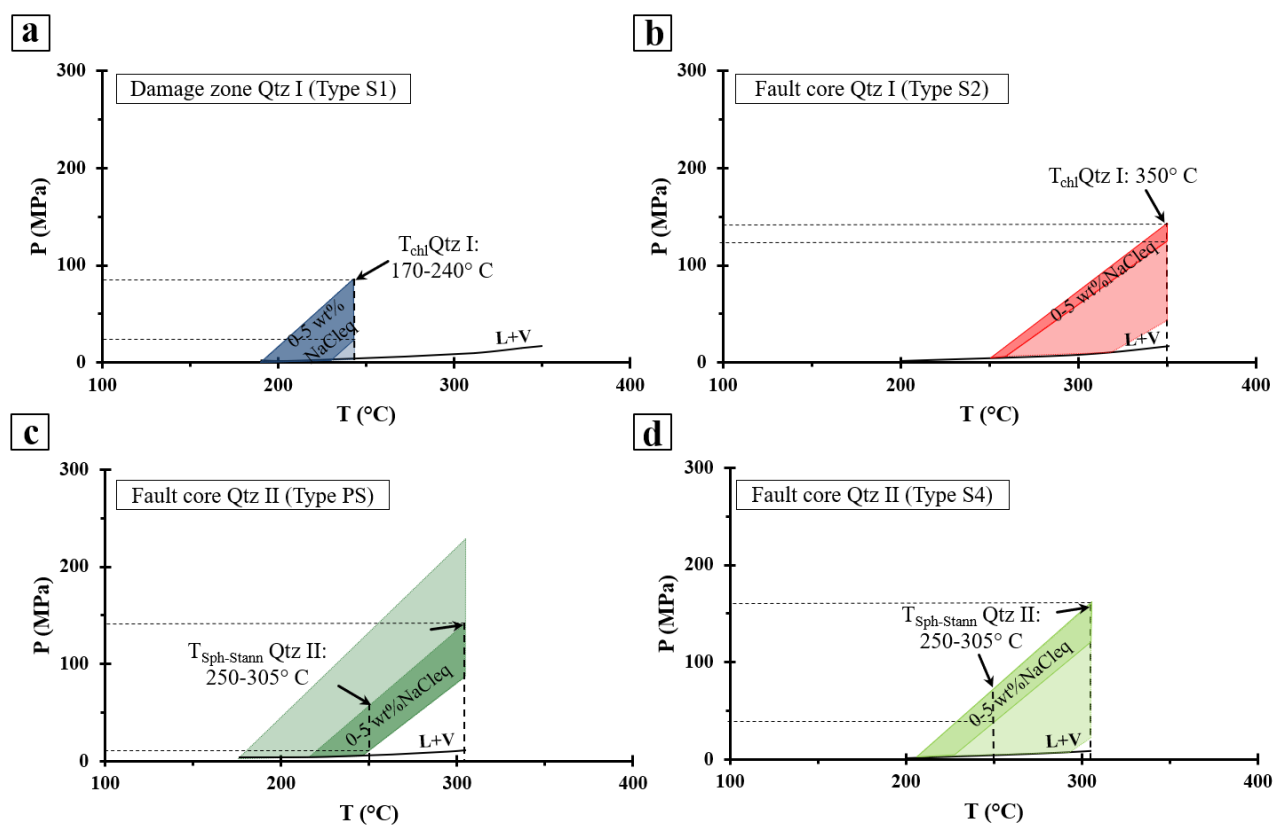

966

967 Figure 12. Estimated fluid pressure for the various typologies of FI discriminated petrographically and on the basis of the identified structural  
 968 domains. Fluid pressures are related to (a) damage zone Qtz I, (b) fault core Qtz I, (c-d) fault core Qtz II. The light-coloured areas are defined  
 969 by the uppermost and lowermost sets of fluid inclusion isochores, while the dark-coloured areas are related to the pressure range calculated for  
 970 isochores computed for the most probable composition of the pristine fluid (salinity between 0 and 5 wt% NaCl<sub>leq</sub>, see text for more details).  
 971 The pressure-temperature areas are also defined by the mineral pairs thermometry (dotted vertical lines), and by the liquid-vapour equilibrium  
 972 curves for the H<sub>2</sub>O-NaCl model fluid. The 240 °C vertical line represents the equilibrium temperature between chlorite and damage zone Qtz I.  
 973 The 350 °C vertical line is the equilibrium temperature between chlorite and fault core Qtz I. The 250-305 °C vertical lines mark the lowest  
 974 and highest sphalerite-stannite equilibrium temperature with Qtz II in the BFZ300 fault core. The thick lower curve marks the bundle of liquid-  
 975 vapour curves for a 1-5 wt% NaCl fault fluid.  
 976

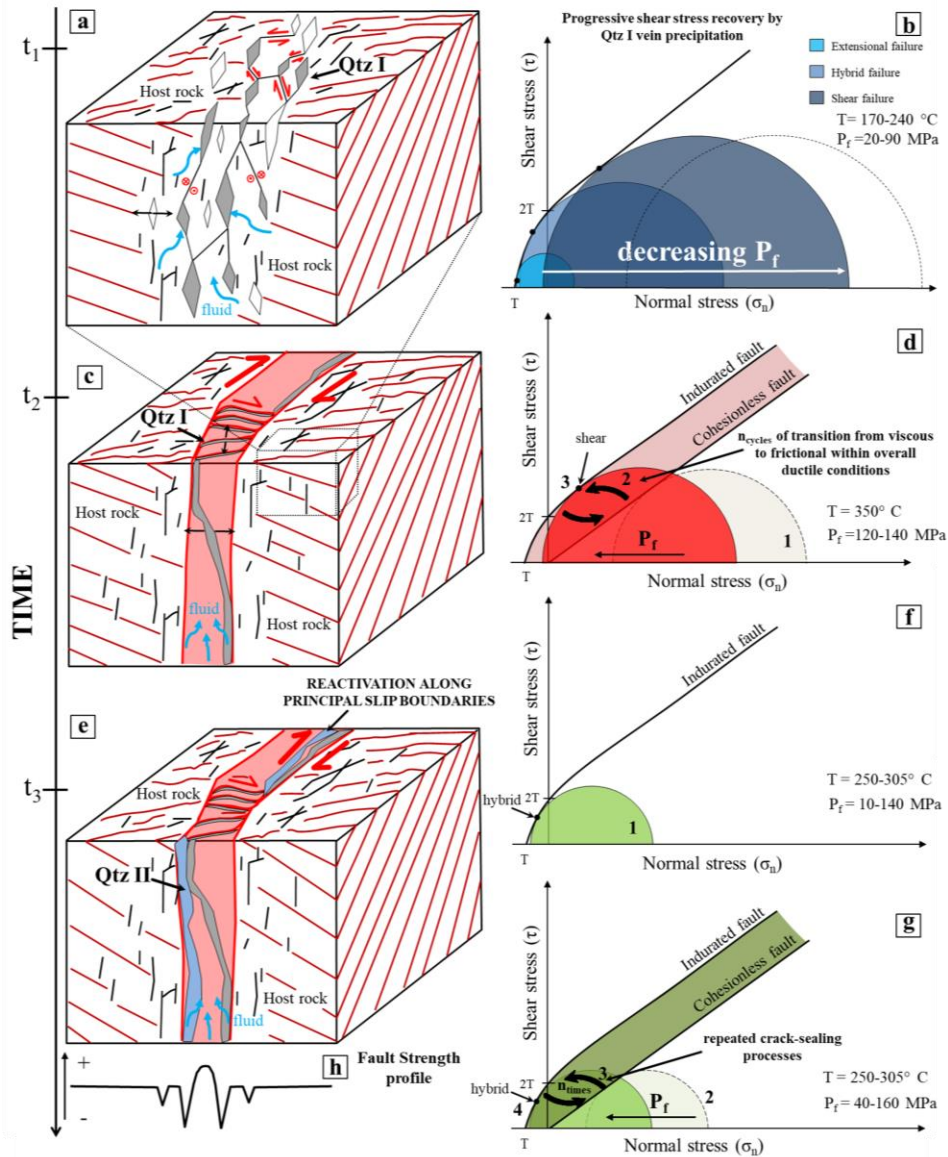

977

978 Figure 13. Conceptual model of the temporal and mechanical evolution of the BFZ300 fault zone (see text for more details). Red lines: traces  
 979 of metamorphic foliation. Black lines: fractures related to the BFZ300 structural development. (a) Initial embrittlement of the migmatitic  
 980 basement occurred by fracture coalescence under (b) initial lower differential stress conditions and high fluid pressure and followed by a  
 981 transient increase of differential stress. A first generation of quartz veins (Qtz I) precipitated inside the diffuse network of joints and  
 982 hybrid/shear fractures which formed during this first deformation stage. (c) Progressive strain localization and fluid channeling within the fault  
 983 core occurred by (d) episodically renewed fluid-pressure build-up driven by cycles of brittle and ductile deformation. (e-g) Progressive  
 984 exhumation and cooling of the fault system occurred concomitant with several brittle reactivation episodes of the fault zone under hybrid  
 985 conditions and fluid pressure lower than during the previous deformational stages. Lastly, a second generation of quartz veins (Qtz II)  
 986 was emplaced, mainly along the principal slip boundaries of the fault core, following the Qtz I vein as shown by (h) the strength profile across the  
 987 fault architecture, that suggests lower tensile strength values (and hence higher reactivation potential) along the Qtz I vein / host rock walls.

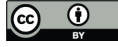

988 Table 1: Schematic summary of main microstructures, fluid properties, and PT deformation conditions in the quartz veins of the BEZ300 fault.

| Structural zone and sample | Qtz type | Deformation type       | Microstructures                                                                      | Fluid properties: salinity and $T_{hot}$                                                           | P/T conditions                                                                                                             |
|----------------------------|----------|------------------------|--------------------------------------------------------------------------------------|----------------------------------------------------------------------------------------------------|----------------------------------------------------------------------------------------------------------------------------|
| Damage zone (PH-21)        | Qtz I    | Brittle/Ductile        | 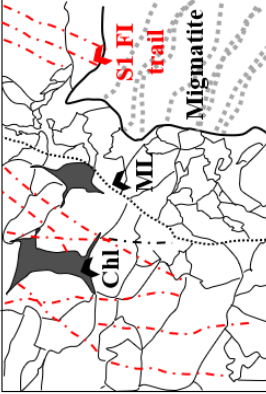  | Type S1: 0-9 wt%NaClecq<br>Type S1: 150-330 °C                                                     | $T_{chl-qtz}$ : 170-240 °C<br>$P_f$ (Type S1): 20-90 MPa                                                                   |
| Fault core (TPH120-4A)     | Qtz I    | Cyclic Brittle/Ductile |   | Type S2: 0-6 wt%NaClecq<br>Type S2: 150-420 °C                                                     | $T_{chl-qtz}$ : 350 °C<br>$P_f$ (Type S2): 120-140 MPa                                                                     |
| Fault core (TPH120-6)      | Qtz II   | Brittle                |  | Type PS: 0-15 wt%NaClecq<br>Type PS: 160-440 °C<br>Type S4: 0-11 wt%NaClecq<br>Type S4: 150-430 °C | $T_{chl-qtz}$ : 160-210 °C<br>$T_{Fe-Zn part.}$ : 220-305 °C<br>$P_f$ (Type PS): 10-140 MPa<br>$P_f$ (Type S4): 40-160 MPa |

989 Note: microstructures are coupled with the corresponding FI types and PT constraints derived from the collected dataset. See text for more  
 990 explanations. Notice that we combine structural and geochemical data to constrain the relationships between stages of mineral-scale deformation and  
 991 fluid circulation, which in turn defines the relative chronology of stages of fluid flow during faulting.  
 992 ML: median line; Blg: bulging.  
 993  
 994  
 995  
 996  
 997  
 998  
 999

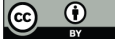

1000 Table 2: Chlorite EPMA from various structural zones of BFZ300

| Sample                                 | 4A    |       | 4A    |       | 4A    |       | 4A    |       | PH21  |       | 2     |       | 2     |       | 2     |       | 6     |       | 6      |       | 6     |       |        |       |       |  |
|----------------------------------------|-------|-------|-------|-------|-------|-------|-------|-------|-------|-------|-------|-------|-------|-------|-------|-------|-------|-------|--------|-------|-------|-------|--------|-------|-------|--|
|                                        | FC    | Qtz I | Ver   | Rad   | FC    | Qtz I | Ver   | Rad   | PH21  | DZ    | Qtz I | Ver   | Rad   | DZ    | Qtz I | Ver   | Rad   | FC    | Qtz II | Ver   | Rad   | FC    | Qtz II | Ver   | Rad   |  |
| Na <sub>2</sub> O                      | 0.04  | 0.07  | 0.00  | 0.08  | 0.08  | 0.08  | 0.03  | 0.03  | 0.05  | 0.02  | 0.04  | 0.03  | 0.03  | 0.01  | 0.01  | 0.05  | 0.04  | 0.06  | 0.01   | 0.01  | 0.01  | 0.01  | 0.01   | 0.01  | 0.01  |  |
| TiO <sub>2</sub>                       | 0.02  | 0.01  | 0.00  | 0.00  | 0.03  | 0.03  | 0.01  | 0.01  | 0.09  | 0.04  | 0.01  | 0.01  | 0.01  | 0.01  | 0.01  | 0.03  | 0.03  | 0.03  | 0.03   | 0.04  | 0.03  | 0.04  | 0.04   | 0.13  | 0.13  |  |
| MnO                                    | 0.59  | 0.65  | 0.62  | 0.53  | 0.56  | 0.48  | 0.48  | 0.24  | 0.24  | 0.30  | 0.48  | 0.37  | 0.43  | 0.37  | 0.43  | 0.43  | 0.64  | 0.57  | 0.71   | 0.60  | 0.60  | 0.71  | 0.60   | 0.60  | 0.60  |  |
| K <sub>2</sub> O                       | 0.06  | 0.02  | 0.04  | 0.07  | 0.06  | 0.04  | 0.04  | 0.01  | 0.01  | 0.03  | 0.10  | 0.05  | 0.07  | 0.05  | 0.07  | 0.03  | 0.02  | 0.02  | 0.05   | 0.01  | 0.01  | 0.05  | 0.01   | 0.01  | 0.01  |  |
| MgO                                    | 13.66 | 13.79 | 13.74 | 6.61  | 5.13  | 6.75  | 13.95 | 14.06 | 13.29 | 12.85 | 12.85 | 12.57 | 12.59 | 12.57 | 12.59 | 4.85  | 4.87  | 8.73  | 8.05   | 8.05  | 8.73  | 8.05  | 8.05   | 8.05  | 8.05  |  |
| SiO <sub>2</sub>                       | 25.49 | 26.00 | 25.83 | 23.62 | 22.89 | 23.91 | 27.24 | 27.02 | 27.49 | 27.43 | 27.88 | 27.79 | 27.79 | 27.88 | 27.79 | 25.63 | 25.64 | 26.5  | 26.5   | 26.5  | 26.5  | 26.5  | 26.5   | 26.5  | 26.5  |  |
| Cr <sub>2</sub> O <sub>3</sub>         | 0.00  | 0.01  | 0.04  | 0.00  | 0.00  | 0.06  | 0.04  | 0.03  | 0.04  | 0.03  | 0.06  | 0     | 0.06  | 0.01  | 0     | 0.02  | 0.01  | 0     | 0.01   | 0     | 0.01  | 0     | 0      | 0     | 0     |  |
| FeO                                    | 27.86 | 27.74 | 27.87 | 36.61 | 38.49 | 36.75 | 24.68 | 25.21 | 26.07 | 25.97 | 26.06 | 25.77 | 25.77 | 26.06 | 25.77 | 34.26 | 33.84 | 30.08 | 30.08  | 30.08 | 30.08 | 30.08 | 30.08  | 30.08 | 30.08 |  |
| CaO                                    | 0.03  | 0.04  | 0.05  | 0.00  | 0.06  | 0.03  | 0.01  | 0.02  | 0     | 0.05  | 0.05  | 0.03  | 0.03  | 0.01  | 0.03  | 0.01  | 0.04  | 0.04  | 0.04   | 0.04  | 0.04  | 0.04  | 0.04   | 0.04  | 0.04  |  |
| Al <sub>2</sub> O <sub>3</sub>         | 22.04 | 22.13 | 22.00 | 22.89 | 23.35 | 22.98 | 24.13 | 24.75 | 24.91 | 24.02 | 23.48 | 23.21 | 23.21 | 23.48 | 23.21 | 24.23 | 24.64 | 24.49 | 24.49  | 24.49 | 24.49 | 24.49 | 24.49  | 24.49 | 24.49 |  |
| Cl                                     | 0.00  | 0.00  | 0.01  | 0.03  | 0.02  | 0.04  | 0.01  | 0     | 0     | 0.01  | 0     | 0     | 0     | 0.01  | 0     | 0.03  | 0.02  | 0.02  | 0.02   | 0.02  | 0.02  | 0.02  | 0.02   | 0.02  | 0.02  |  |
| Total                                  | 89.78 | 90.45 | 90.20 | 90.44 | 90.67 | 91.09 | 90.69 | 91.42 | 92.23 | 91.12 | 90.81 | 90.08 | 90.08 | 90.81 | 90.08 | 89.82 | 89.94 | 90.78 | 90.78  | 90.78 | 90.78 | 90.78 | 90.78  | 90.78 | 90.78 |  |
| No. ions in formula Based on 28 (O,OH) |       |       |       |       |       |       |       |       |       |       |       |       |       |       |       |       |       |       |        |       |       |       |        |       |       |  |
| Na                                     | 0.02  | 0.03  | 0     | 0.03  | 0.03  | 0.01  | 0.02  | 0.01  | 0.02  | 0.01  | 0.01  | 0.01  | 0.02  | 0.01  | 0.01  | 0.02  | 0.02  | 0.03  | 0      | 0.01  | 0.01  | 0.01  | 0      | 0.01  | 0.01  |  |
| Ti                                     | 0     | 0     | 0     | 0     | 0     | 0     | 0.01  | 0.01  | 0.01  | 0.01  | 0     | 0     | 0.01  | 0     | 0.01  | 0     | 0.01  | 0.01  | 0.01   | 0.01  | 0.01  | 0.01  | 0.01   | 0.01  | 0.01  |  |
| Mn                                     | 0.10  | 0.11  | 0.11  | 0.10  | 0.10  | 0.09  | 0.04  | 0.04  | 0.05  | 0.08  | 0.06  | 0.07  | 0.07  | 0.06  | 0.07  | 0.12  | 0.10  | 0.12  | 0.12   | 0.12  | 0.12  | 0.12  | 0.12   | 0.12  | 0.12  |  |
| K                                      | 0.01  | 0     | 0.01  | 0.02  | 0.02  | 0.01  | 0     | 0     | 0.01  | 0.02  | 0.01  | 0.02  | 0.01  | 0.02  | 0.01  | 0.02  | 0.01  | 0     | 0.01   | 0     | 0.01  | 0     | 0.01   | 0     | 0     |  |
| Mg                                     | 4.25  | 4.25  | 4.25  | 2.14  | 1.68  | 2.17  | 4.18  | 4.19  | 3.93  | 3.86  | 3.79  | 3.82  | 3.82  | 3.79  | 3.82  | 1.55  | 1.55  | 2.69  | 2.49   | 2.49  | 2.69  | 2.49  | 2.49   | 2.49  | 2.49  |  |
| Si                                     | 5.32  | 5.37  | 5.36  | 5.14  | 5.02  | 5.15  | 5.48  | 5.40  | 5.46  | 5.53  | 5.64  | 5.66  | 5.66  | 5.64  | 5.66  | 5.49  | 5.47  | 5.48  | 5.43   | 5.43  | 5.48  | 5.43  | 5.43   | 5.43  | 5.43  |  |
| Cr                                     | 0     | 0     | 0.01  | 0     | 0     | 0.01  | 0.01  | 0     | 0.01  | 0     | 0.01  | 0     | 0.01  | 0     | 0.01  | 0     | 0     | 0     | 0      | 0     | 0     | 0     | 0      | 0     | 0     |  |
| Fe <sup>2+</sup>                       | 4.86  | 4.79  | 4.83  | 6.66  | 7.06  | 6.62  | 4.15  | 4.21  | 4.33  | 4.38  | 4.40  | 4.39  | 4.39  | 4.40  | 4.39  | 6.14  | 6.04  | 5.20  | 5.29   | 5.29  | 5.20  | 5.29  | 5.29   | 5.29  | 5.29  |  |
| Ca                                     | 0.01  | 0.01  | 0.01  | 0     | 0.01  | 0.01  | 0     | 0     | 0.01  | 0.01  | 0.01  | 0.01  | 0.01  | 0.01  | 0.01  | 0     | 0.01  | 0.01  | 0.01   | 0.01  | 0.01  | 0.01  | 0.01   | 0.01  | 0.01  |  |
| Al                                     | 5.42  | 5.39  | 5.38  | 5.86  | 6.04  | 5.84  | 5.72  | 5.83  | 5.71  | 5.59  | 5.57  | 5.57  | 5.57  | 5.59  | 5.57  | 6.12  | 6.20  | 5.97  | 6.13   | 6.13  | 5.97  | 6.13  | 6.13   | 6.13  | 6.13  |  |
| Cl                                     | 0     | 0     | 0     | 0.01  | 0.01  | 0.01  | 0     | 0     | 0     | 0     | 0     | 0     | 0     | 0     | 0     | 0.01  | 0.01  | 0.01  | 0.01   | 0.01  | 0.01  | 0.01  | 0.01   | 0.01  | 0.01  |  |
| Fe                                     | 4.86  | 4.79  | 4.83  | 6.66  | 7.06  | 6.62  | 4.15  | 4.21  | 4.33  | 4.38  | 4.40  | 4.39  | 4.39  | 4.40  | 4.39  | 6.14  | 6.04  | 5.20  | 5.29   | 5.29  | 5.20  | 5.29  | 5.29   | 5.29  | 5.29  |  |
| Al Tetr                                | 2.68  | 2.63  | 2.64  | 2.86  | 2.98  | 2.85  | 2.52  | 2.60  | 2.54  | 2.47  | 2.37  | 2.34  | 2.34  | 2.37  | 2.34  | 2.51  | 2.53  | 2.52  | 2.57   | 2.57  | 2.52  | 2.57  | 2.57   | 2.57  | 2.57  |  |
| Al Oct                                 | 2.73  | 2.76  | 2.73  | 3.00  | 3.06  | 2.99  | 3.20  | 3.22  | 3.29  | 3.24  | 3.23  | 3.23  | 3.23  | 3.23  | 3.23  | 3.61  | 3.67  | 3.45  | 3.56   | 3.56  | 3.45  | 3.56  | 3.56   | 3.56  | 3.56  |  |
| Based on 28 (O,OH)                     |       |       |       |       |       |       |       |       |       |       |       |       |       |       |       |       |       |       |        |       |       |       |        |       |       |  |
| R <sup>2+</sup>                        | 9.11  | 9.04  | 9.08  | 8.80  | 8.74  | 8.79  | 8.33  | 8.40  | 8.26  | 8.24  | 8.19  | 8.21  | 8.21  | 8.19  | 8.21  | 7.69  | 7.59  | 7.90  | 7.79   | 7.79  | 7.90  | 7.79  | 7.79   | 7.79  | 7.79  |  |
| Si                                     | 5.32  | 5.37  | 5.36  | 5.14  | 5.02  | 5.15  | 5.48  | 5.40  | 5.46  | 5.53  | 5.64  | 5.66  | 5.66  | 5.64  | 5.66  | 5.49  | 5.47  | 5.48  | 5.43   | 5.43  | 5.48  | 5.43  | 5.43   | 5.43  | 5.43  |  |
| Based on 14 (O,OH)                     |       |       |       |       |       |       |       |       |       |       |       |       |       |       |       |       |       |       |        |       |       |       |        |       |       |  |
| R <sup>2+</sup>                        | 4.55  | 4.52  | 4.54  | 4.40  | 4.37  | 4.40  | 4.17  | 4.20  | 4.13  | 4.12  | 4.10  | 4.10  | 4.10  | 4.10  | 4.10  | 3.84  | 3.79  | 3.95  | 3.89   | 3.89  | 3.95  | 3.89  | 3.89   | 3.89  | 3.89  |  |
| Si                                     | 2.66  | 2.68  | 2.68  | 2.57  | 2.51  | 2.58  | 2.74  | 2.70  | 2.73  | 2.77  | 2.82  | 2.83  | 2.83  | 2.82  | 2.83  | 2.75  | 2.74  | 2.74  | 2.74   | 2.74  | 2.74  | 2.74  | 2.74   | 2.74  | 2.74  |  |



1001 Table 3: Representative EPMA of sulphides associated with Qtz II

| Analysis     | Structural zone | Qtz type | Mineral      | S     | Fe    | Cu    | As   | Pb    | Ni   | Zn    | Ti    | Sn    | Total  |
|--------------|-----------------|----------|--------------|-------|-------|-------|------|-------|------|-------|-------|-------|--------|
| TPH120-6-14  | Core            | II       | pyrite       | 55.02 | 47.50 | 0.01  | 0.00 | 0.00  | 0.02 | 0.00  | 0.00  |       | 102.55 |
| TPH120-6-17  | Core            | II       | pyrite       | 54.08 | 47.19 | 0.00  | 0.01 | 0.00  | 0.00 | 0.00  | 0.00  |       | 101.28 |
| TPH120-6-18  | Core            | II       | sphalerite   | 34.46 | 6.46  | 0.09  | 0.01 | 0.00  | 0.03 | 59.62 | 0.02  |       | 100.69 |
| TPH120-6-19  | Core            | II       | sphalerite   | 34.48 | 6.24  | 0.08  | 0.06 | 0.00  | 0.04 | 59.61 | 0.02  |       | 100.53 |
| TPH120-4A-34 | Core            | II       | pyrite       | 54.49 | 47.40 | 0.05  | 0.00 | 0.00  | 0.00 | 0.00  | 0.00  |       | 101.94 |
| TPH120-4A-35 | Core            | II       | pyrite       | 54.13 | 47.26 | 0.02  | 0.04 | 0.00  | 0.00 | 0.01  | 0.55  |       | 102.01 |
| TPH120-4A-38 | Core            | II       | galena       | 13.40 | 0.00  | 0.00  | 0.00 | 86.63 | 0.00 | 0.32  | 0.01  |       | 100.36 |
| TPH120-4A-59 | Core            | II       | galena       | 13.50 | 0.06  | 0.00  | 0.01 | 87.04 | 0.00 | 0.10  | 0.01  |       | 100.72 |
| TPH120-4A-40 | Core*           | II       | sphalerite   | 35.06 | 9.46  | 0.05  | 0.00 | 0.00  | 0.00 | 56.74 | 0.01  |       | 101.32 |
| TPH120-4A-43 | Core*           | II       | sphalerite   | 34.69 | 9.04  | 0.01  | 0.03 | 0.00  | 0.00 | 57.51 | 0.01  |       | 101.28 |
| TPH120-4A-41 | Core            | II       | chalcopyrite | 35.40 | 30.53 | 33.51 | 0.00 | 0.00  | 0.00 | 1.32  | 0.00  |       | 100.76 |
| TPH120-4A-42 | Core            | II       | chalcopyrite | 35.78 | 30.78 | 33.59 | 0.03 | 0.00  | 0.01 | 1.22  | 0.01  |       | 101.42 |
| TPH120-4A-19 | Core **         | II       | stannite     | 29.79 | 12.53 | 28.41 | 0.07 | 0.08  | 0.00 | 0.92  | 0.000 | 27.86 | 99.66  |
| TPH120-4A-22 | Core **         | II       | sphalerite   | 33.82 | 8.15  | 0.06  | 0.00 | 0.03  | 0.02 | 57.27 | 0.006 | 0.00  | 99.36  |

1002 Note: \* - located within cataclastic band and close to stylolite. \*\* - located along stylolite

1003 Sphalerite and stannite compositions from locations indicated by \*\* have been used to calculate the temperatures of sphalerite-stannite equilibrium

1004 following the geothermometer of Shimizu and Shikazono (1985). See text for more explanations.
